# Supplementary material
Source: PubMed Central journal article supplement (PMC3153419)
Supplement: NIHMS304222-supplement-supplement_1.pdf [file NIHMS304222-supplement-supplement_1.pdf]

# Supplemental Figure 1

Week 4-Network 1

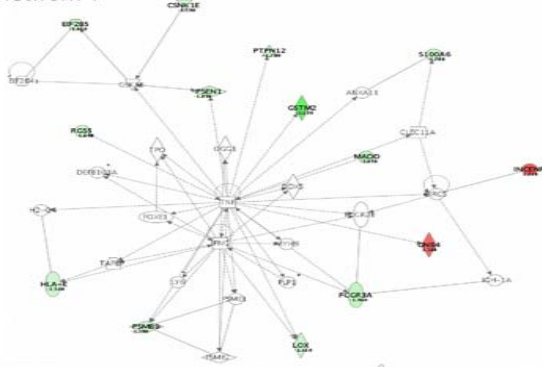

Network 2

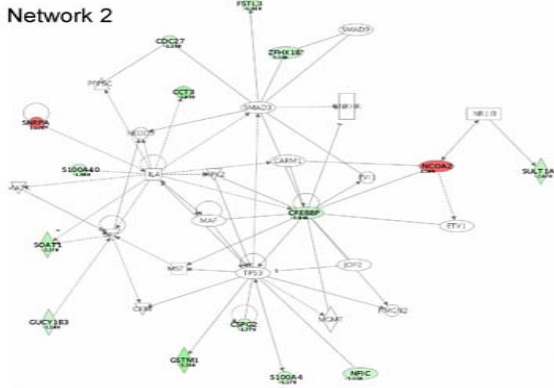

Network 3

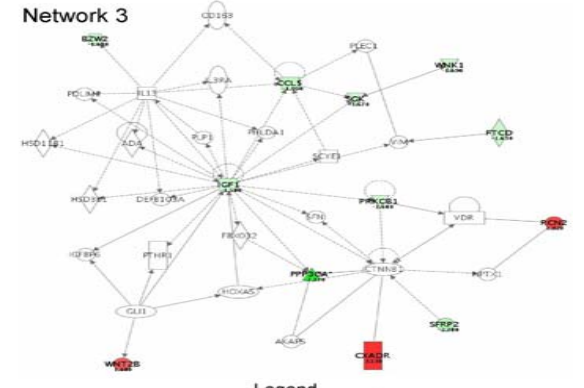

Week 12-Network 1

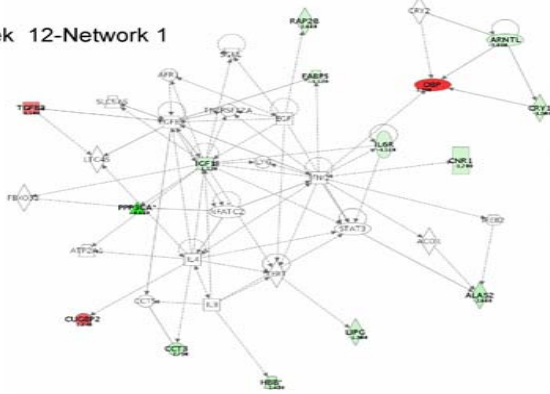

Network 2

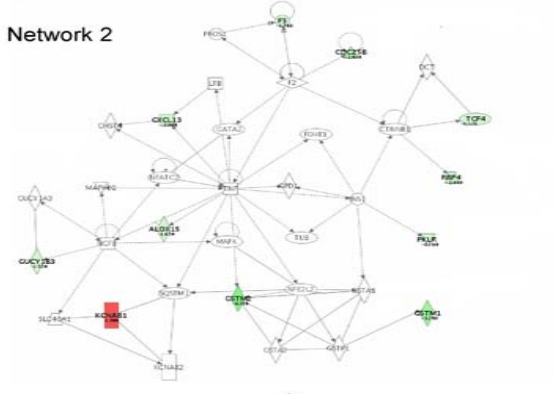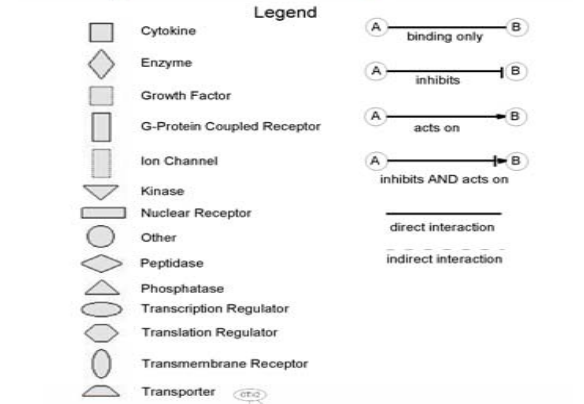

Week 20-Network 1

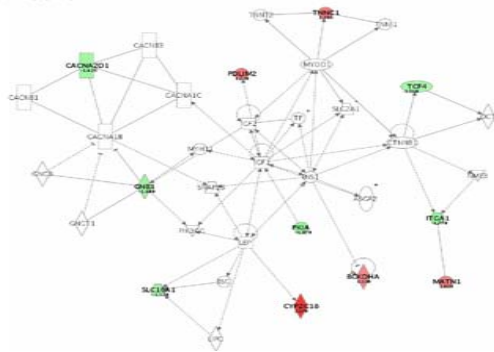

Network 2

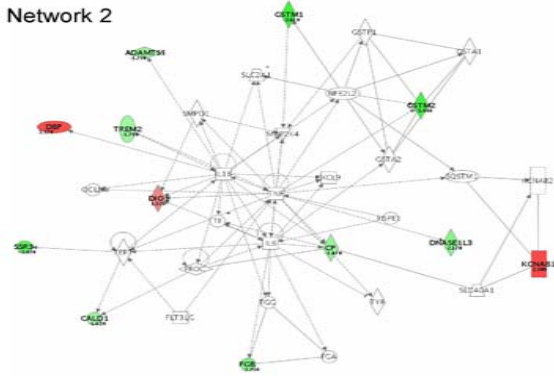

Network 3

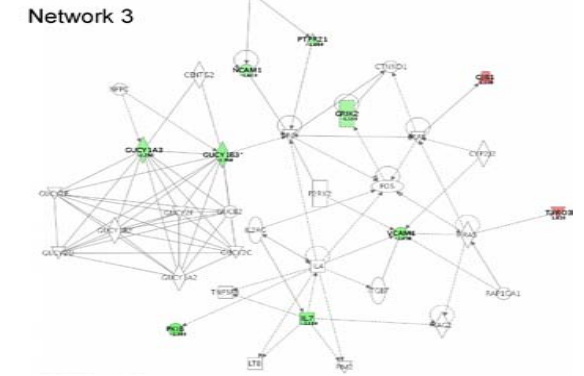

## Supplemental Figure 2

**A** Network 1

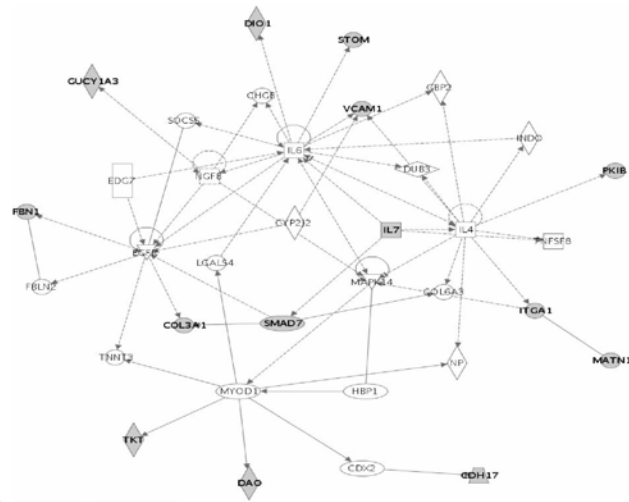

| Top Function (All Networks)                   | Significance      |
|-----------------------------------------------|-------------------|
| Cellular Assembly and Organization            | 7.15E-5 - 4.86E-2 |
| Cellular Movement                             | 1.47E-4 - 4.86E-2 |
| Immune and Lymphatic Development and Function | 1.48E-4 - 4.86E-2 |
| Immune Response                               | 1.48E-4 - 4.86E-2 |

| High Level Functions              | Significance      |
|-----------------------------------|-------------------|
| Cellular Function and Maintenance | 1.76E-9 - 6.33E-4 |
| Cancer                            | 7.32E-9 - 3.76E-3 |
| Inflammatory Disease              | 2.85E-7 - 2.36E-3 |
| Cell Morphology                   | 1.80E-6 - 2.36E-3 |

**B** Network 2

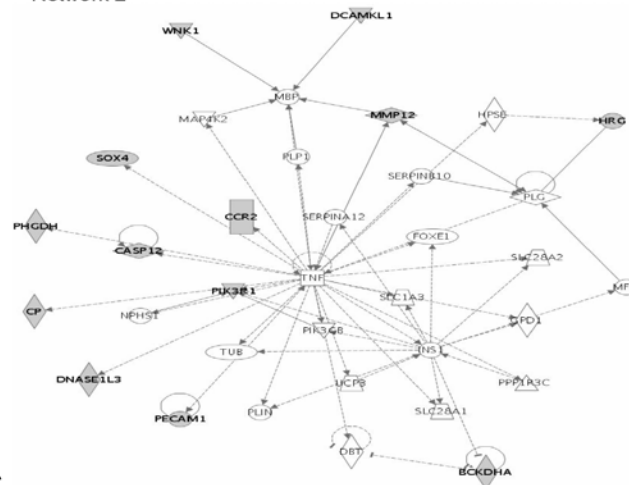

| High Level Functions         | Significance      |
|------------------------------|-------------------|
| Molecular Transport          | 2.07E-7 - 3.84E-3 |
| Carbohydrate Metabolism      | 2.42E-7 - 3.84E-3 |
| Small Molecular Biochemistry | 2.42E-7 - 3.84E-3 |
| Cell Death                   | 1.80E-6 - 3.84E-3 |

**C** Network 3

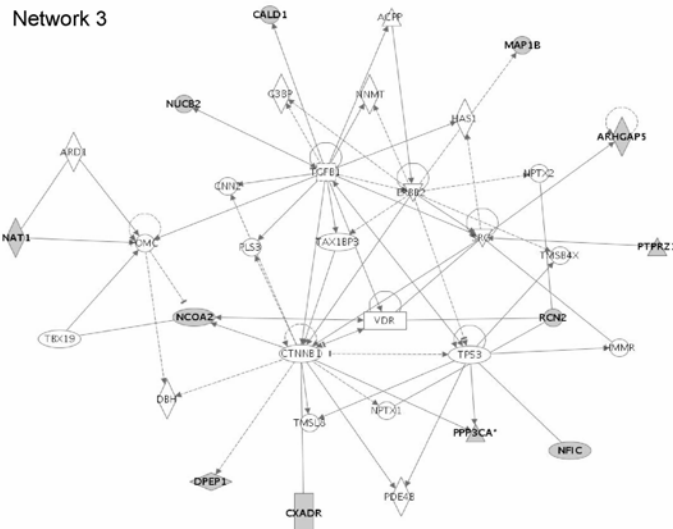

| High Level Functions              | Significance      |
|-----------------------------------|-------------------|
| Cellular Movement                 | 2.07E-7 - 3.36E-3 |
| Cellular Growth and Proliferation | 2.42E-7 - 3.76E-3 |
| Reproductive System Disease       | 2.42E-7 - 3.84E-3 |
| Cancer                            | 2.42E-7 - 3.84E-3 |

**Supplemental Figure 1.** Functional network analysis of genes differentially expressed between S and S.SHR(2) congenic at week 4, 12 , and 20. Nodes represent genes, with their shape representing the functional class of the gene product (see legend). The lines connecting the nodes indicate the biological relationship between each node (see legend). Nodes are color coded based on degree and direction of fold change [red, S.SHR(2) is overexpressed compared to S; and green, S.SHR(2) is underexpressed compared to S]. Note: each network is numbered (e.g. 1, 2...) based on the number of focus genes it contains. So, network 1 at week 4 and network 1 at week 12 need not be related.

**Supplemental Figure 2.** Functional network analysis of genes differentially expressed between S and S.SHR(2) and over time (strain X time). Nodes represent genes, with their shape representing the functional class of the gene product (see figure legend , supplemental Fig. 1). The lines connecting the nodes indicate the biological relationship between each node. Shaded nodes are genes found to be differentially expressed between strains and over time. High level functions for each network and significance level are shown. Top functions in the entire data set are also shown.

Type of file: table

Label: Tables S1 - S4

Filename: Copy of SupplementalTables1-4.xls

Table 1

| Chromosome | Gene Identifier | Gene ID | Other ID | Position (Mb) | Direction | Week4 |         | Week12 |         | Week20 |         | Gene Description                                                                                         |                                                                                                                                                             |                                                                                                                                               |
|------------|-----------------|---------|----------|---------------|-----------|-------|---------|--------|---------|--------|---------|----------------------------------------------------------------------------------------------------------|-------------------------------------------------------------------------------------------------------------------------------------------------------------|-----------------------------------------------------------------------------------------------------------------------------------------------|
|            |                 |         |          |               |           | Ratio | p-value | Ratio  | p-value | Ratio  | p-value |                                                                                                          |                                                                                                                                                             |                                                                                                                                               |
| 1          | BP399429        | -       | 1389026  | 149425862     | Up        | 1.6   | 0.0157  | 0.1555 |         |        |         | Rattus norvegicus similar to RIKEN cDNA 4633417L02 (LOC293117), mRNA                                     |                                                                                                                                                             |                                                                                                                                               |
| 1          | BP399429        | -       | 1389252  | 212326940     | Down      | 1.7   | 0.0427  | 0.2103 |         |        |         | Rattus norvegicus similar to inner centromere protein-8 (LOC293733), mRNA                                |                                                                                                                                                             |                                                                                                                                               |
| 1          | BI289559        | -       | 1393376  | 173556971     | Up        | 1.5   | 0.1441  | 0.1468 |         |        |         | Rattus norvegicus similar to SOXB6 (LOC293165), mRNA                                                     |                                                                                                                                                             |                                                                                                                                               |
| 1          | AI230728        | Snrpa   | 1388436  | 82295660      | Up        | 1.5   | 0.1193  | 0.1677 |         |        |         | Rattus norvegicus similar to U1 small nuclear ribonucleoprotein A (U1 snRNP A protein) (LOC292729), mRNA |                                                                                                                                                             |                                                                                                                                               |
| 1          | BP399445        | -       | 1373465  | 207398410     | Down      | 2.6   | 0.0021  | 0.0024 |         |        |         | Rattus norvegicus similar to nuclear cap-binding protein 3, subunit 10 (ncaps 10) (trans. 15011702a)     |                                                                                                                                                             |                                                                                                                                               |
| 1          | AF304763        | Sufl1a1 | 1370019  | 185829205     | Down      | 2.1   | 0.0298  | 0.1894 |         |        |         | sulfotransferase family 1A, phenol-polyferin, member 1                                                   |                                                                                                                                                             |                                                                                                                                               |
| 1          | AI408286        | -       | 1378193  | 213828662     | Down      | 1.8   | 0.0481  | 0.2103 |         |        |         | Rattus norvegicus similar to RIKEN cDNA AA430103C15 (LOC293744), mRNA                                    |                                                                                                                                                             |                                                                                                                                               |
| 1          | NM_019232       | Sgk     | 1367802  | 23401262      | Down      | 1.7   | 0.1181  | 0.1640 |         |        |         | serine/threonine-specific protein kinase                                                                 |                                                                                                                                                             |                                                                                                                                               |
| 1          | AI145746        | -       | 1392249  | 20355444      | Down      | 1.6   | 0.0007  | 0.0593 |         |        |         | Rattus norvegicus transcribed sequences                                                                  |                                                                                                                                                             |                                                                                                                                               |
| 1          | AA964142        | -       | 1398888  | 167532994     | Down      | 2.1   | 0.0011  | 0.0973 |         |        | 1.7     | 0.0044                                                                                                   | 0.0372                                                                                                                                                      | Rattus norvegicus similar to RIKEN cDNA 2610209A2 (LOC368121), mRNA                                                                           |
| 1          | YX4443          | Prxcb3  | 1370585  | 151118102     | Down      | 1.7   | 0.0027  | 0.0711 |         |        | 2.4     | 0.0039                                                                                                   | 0.0217                                                                                                                                                      | protein kinase C, beta 1                                                                                                                      |
| 1          | AA858962        | Rbp4    | 1371762  | 242443798     | Down      | 2.4   | 0.0039  | 0.0217 |         |        |         |                                                                                                          | retinol binding protein 4                                                                                                                                   |                                                                                                                                               |
| 1          | NM_033234       | Hbb     | 1367553  | 161590568     | Down      | 2.4   | 0.0165  | 0.0461 |         |        |         |                                                                                                          | hemoglobin beta chain complex                                                                                                                               |                                                                                                                                               |
| 1          | BI287200        | Hbb     | 1371245  | 161518261     | Down      | 2.4   | 0.0074  | 0.0292 |         |        |         |                                                                                                          | Rat hemoglobin beta-chain mRNA                                                                                                                              |                                                                                                                                               |
| 1          | U13263          | Fabp5   | 1370281  | 218829748     | Down      | 1.6   | 0.0059  | 0.0241 |         |        |         |                                                                                                          | fatty acid binding protein 5, epidermal                                                                                                                     |                                                                                                                                               |
| 1          | AI230048        | Dbp     | 1387874  | 96173573      | Up        | 2.3   | 0.0252  | 0.0574 |         |        | 2.3     | 0.0007                                                                                                   | 0.0216                                                                                                                                                      | D site albumin promoter binding protein                                                                                                       |
| 1          | AB012660        | Amitl   | 1370510  | 114132014     | Down      | 1.6   | 0.0221  | 0.0538 |         |        | 3.0     | 0.0294                                                                                                   | 0.0639                                                                                                                                                      | aryl hydrocarbon receptor nuclear translocator-like                                                                                           |
| 1          | AI189562        | RSK-4   | 1371050  | 94412893      | Down      | 1.6   | 0.0221  | 0.0538 |         |        | 3.0     | 0.0294                                                                                                   | 0.0639                                                                                                                                                      | kinase                                                                                                                                        |
| 1          | NM_018184       | Cyp2c2  | 1387328  | 243281320     | Down      | 2.6   | 0.0034  | 0.0327 |         |        | 2.8     | 0.0051                                                                                                   | 0.0392                                                                                                                                                      | Cytochrome P450, subfamily IIC (mephentoin 4-hydroxylase)                                                                                     |
| 1          | BM385272        | -       | 1393139  | 76971904      | Up        | 2.0   | 0.0051  | 0.0392 |         |        | 1.8     | 0.0117                                                                                                   | 0.0323                                                                                                                                                      | Rattus norvegicus similar to Adiponectin O2 (LOC292697), mRNA                                                                                 |
| 1          | BI981129        | -       | 1373369  | 197054477     | Up        | 2.0   | 0.0145  | 0.0554 |         |        |         |                                                                                                          | Cytochrome P450 monooxygenase CYP11B                                                                                                                        |                                                                                                                                               |
| 1          | BM390571        | -       | 1378248  | 96197898      | Up        | 1.9   | 0.0410  | 0.0888 |         |        |         |                                                                                                          | Rattus norvegicus similar to cytosolic sulfotransferase (LOC292915), mRNA                                                                                   |                                                                                                                                               |
| 1          | AW522786        | -       | 1378867  | 140157974     | Up        | 1.9   | 0.0062  | 0.0477 |         |        |         |                                                                                                          | Rattus norvegicus transcribed sequences                                                                                                                     |                                                                                                                                               |
| 1          | BP286052        | -       | 1393474  | 96197898      | Up        | 1.7   | 0.0122  | 0.0526 |         |        |         |                                                                                                          | Rattus norvegicus similar to cytosolic sulfotransferase (LOC292915), mRNA                                                                                   |                                                                                                                                               |
| 1          | AI060133        | -       | 1382476  | 207556536     | Up        | 1.6   | 0.0242  | 0.0700 |         |        | 2.3     | 0.0047                                                                                                   | 0.0190                                                                                                                                                      | similarity to protein pdb 1L6G (E. coli) B Chain B, Lactose Operon Repressor Bound To 21-Base Pair Symmetric Operator Dna, Alpha Carbons Only |
| 1          | NM_033781       | Cyp21   | 1390596  | 233410939     | Up        | 1.6   | 0.0308  | 0.0780 |         |        |         |                                                                                                          | Rattus norvegicus similar to Melanoma antigen recognized by T-cells 1, (MAST1-1) (Melan-A protein) (Antigen L839-AA) (Antigen SC29-AA), mRNA                |                                                                                                                                               |
| 1          | NM_143436       | Cyp21   | 1390596  | 82229569      | Up        | 1.6   | 0.0308  | 0.0780 |         |        |         |                                                                                                          | Cytochrome P450 monooxygenase CYP21                                                                                                                         |                                                                                                                                               |
| 1          | BF561222        | -       | 1382424  | 87626241      | Up        | 1.6   | 0.0002  | 0.0173 |         |        |         |                                                                                                          | Rattus norvegicus transcribed sequence with moderate similarity to protein pI60307 (E. coli) 850307 beta-galactosidase, alpha peptide - Escherichia coli    |                                                                                                                                               |
| 1          | NM_033711       | Arf2    | 1368166  | 208909458     | Up        | 1.6   | 0.0283  | 0.0742 |         |        |         |                                                                                                          | AHP-ribosylase-like 2                                                                                                                                       |                                                                                                                                               |
| 1          | AA054379        | Arp1    | 1390017  | 85390213      | Down      | 1.6   | 0.0458  | 0.0937 |         |        |         |                                                                                                          | Rattus norvegicus transcribed sequence with strong similarity to protein ref NP_005157 (H.sapiens) amyloid beta (A4) precursor-like protein 1 Homo sapiens1 |                                                                                                                                               |
| 1          | BE098025        | -       | 1374924  | 22263990      | Up        | 1.5   | 0.0093  | 0.0493 |         |        |         |                                                                                                          | Rattus norvegicus transcribed sequences                                                                                                                     |                                                                                                                                               |
| 1          | BE112882        | -       | 1383008  | 201997982     | Up        | 1.5   | 0.0284  | 0.0723 |         |        |         |                                                                                                          | Rattus norvegicus similar to TOLLUP protein (LOC361677), mRNA                                                                                               |                                                                                                                                               |
| 1          | AI287507        | Bochkha | 1317981  | 60837907      | Up        | 1.5   | 0.0098  | 0.0448 |         |        |         |                                                                                                          | branched chain keto acid decarboxylase subunit E1, alpha polypeptide                                                                                        |                                                                                                                                               |
| 1          | BI283664        | -       | 1377209  | 131370265     | Up        | 1.5   | 0.0029  | 0.0327 |         |        |         |                                                                                                          | Rattus norvegicus transcribed sequences                                                                                                                     |                                                                                                                                               |
| 1          | AI072405        | Aap11   | 1384877  | 164973796     | Up        | 1.5   | 0.0100  | 0.0493 |         |        |         |                                                                                                          | scaevola 11                                                                                                                                                 |                                                                                                                                               |
| 1          | BI099174        | -       | 1382118  | 245725403     | Down      | 1.5   | 0.0051  | 0.0327 |         |        |         |                                                                                                          | Rattus norvegicus similar to RIKEN cDNA 4303521E07 (LOC309486), mRNA                                                                                        |                                                                                                                                               |
| 1          | AI008432        | -       | 1392843  | 31940826      | Down      | 2.2   | 0.0174  | 0.0610 |         |        |         |                                                                                                          | Rattus norvegicus transcribed sequences                                                                                                                     |                                                                                                                                               |
| 1          | BM389922        | -       | 1380768  | 14816855      | Down      | 2.1   | 0.0082  | 0.0477 |         |        |         |                                                                                                          | Rattus norvegicus transcribed sequences                                                                                                                     |                                                                                                                                               |
| 1          | BM382448        | -       | 1383688  | 168011643     | Down      | 1.9   | 0.0119  | 0.0522 |         |        |         |                                                                                                          | Rattus norvegicus transcribed sequences                                                                                                                     |                                                                                                                                               |
| 1          | BF397243        | -       | 1395047  | 241156989     | Down      | 1.9   | 0.0007  | 0.0216 |         |        |         |                                                                                                          | Rattus norvegicus similar to tankyrase, TRF1-interacting ankyrin-related ADP-ribose polymerase 2, tankyrase 2 (LOC309512), mRNA                             |                                                                                                                                               |
| 1          | AW920054        | Ctsc    | 1397808  | 144840775     | Down      | 1.9   | 0.0415  | 0.0888 |         |        |         |                                                                                                          | Rattus norvegicus transcribed sequences                                                                                                                     |                                                                                                                                               |
| 1          | BE091460        | -       | 1380760  | 463994401     | Down      | 1.8   | 0.0068  | 0.0448 |         |        |         |                                                                                                          | Rattus norvegicus transcribed sequences                                                                                                                     |                                                                                                                                               |
| 1          | AI114002        | -       | 1374775  | 195310301     | Down      | 1.8   | 0.0134  | 0.0546 |         |        |         |                                                                                                          | Rattus norvegicus similar to pC-F7 (LOC291234), mRNA                                                                                                        |                                                                                                                                               |
| 1          | AI511069        | -       | 1378391  | 109033934     | Down      | 1.7   | 0.0070  | 0.0448 |         |        |         |                                                                                                          | Rattus norvegicus transcribed sequences                                                                                                                     |                                                                                                                                               |
| 1          | AI170304        | Mbeat1  | 1389006  | 215387912     | Down      | 1.7   | 0.0069  | 0.0493 |         |        |         |                                                                                                          | macrophage-expressed gene 1                                                                                                                                 |                                                                                                                                               |
| 1          | AA909491        | -       | 1385351  | 46385119      | Down      | 1.7   | 0.0431  | 0.0933 |         |        |         |                                                                                                          | Rattus norvegicus transcribed sequences                                                                                                                     |                                                                                                                                               |
| 1          | BI289045        | -       | 1381557  | 219904685     | Down      | 1.6   | 0.0379  | 0.0866 |         |        |         |                                                                                                          | Rattus norvegicus transcribed sequences                                                                                                                     |                                                                                                                                               |
| 1          | AI008409        | -       | 1389986  | 208427238     | Down      | 1.6   | 0.0267  | 0.0712 |         |        |         |                                                                                                          | Rattus norvegicus transcribed sequence with strong similarity to protein spP00722 (E. coli) B GAL_ECOLI Beta-galactosidase (Lactase)                        |                                                                                                                                               |
| 1          | BM389792        | -       | 1397463  | 245429376     | Down      | 1.6   | 0.0048  | 0.0162 |         |        |         |                                                                                                          | Rattus norvegicus similar to pC-F7 (LOC291234), mRNA                                                                                                        |                                                                                                                                               |
| 1          | AI171480        | -       | 1390909  | 162170846     | Down      | 1.6   | 0.0007  | 0.0126 |         |        |         |                                                                                                          | similarity to protein pdb 1J25 (E. coli) B Chain B, E. Coli (LacZ) Beta-Galactosidase In Complex With D-Galactopyranosyl-1-On                               |                                                                                                                                               |
| 1          | BE115281        | Qki     | 1372542  | 45026384      | Down      | 1.5   | 0.0326  | 0.0788 |         |        |         |                                                                                                          | Rattus norvegicus transcribed sequences                                                                                                                     |                                                                                                                                               |
| 1          | AI245172        | Qki     | 1387659  | 224517843     | Down      | 1.5   | 0.0418  | 0.0888 |         |        |         |                                                                                                          | guanine deaminase                                                                                                                                           |                                                                                                                                               |
| 1          | BG670294        | -       | 1390107  | 147022234     | Down      | 1.5   | 0.0095  | 0.0493 |         |        |         |                                                                                                          | similarity to protein pdb 1L6G (E. coli) B Chain B, Lactose Operon Repressor Bound To 21-Base Pair Symmetric Operator Dna, Alpha Carbons Only               |                                                                                                                                               |
| 2          | AI501417        | -       | 1386831  | 140736218     | Up        | 2.4   | 0.0312  | 0.1809 |         |        |         |                                                                                                          | Rattus norvegicus transcribed sequences                                                                                                                     |                                                                                                                                               |
| 2          | BE282916        | -       | 1392728  | 100709895     | Up        | 1.9   | 0.0092  | 0.0493 |         |        |         |                                                                                                          | Rattus norvegicus transcribed sequences                                                                                                                     |                                                                                                                                               |
| 2          | BE112158        | -       | 1374640  | 189287027     | Up        | 1.7   | 0.0426  | 0.2103 |         |        |         |                                                                                                          | Rattus norvegicus transcribed sequences                                                                                                                     |                                                                                                                                               |
| 2          | BF543355        | Isgf10  | 1390901  | 148704637     | Up        | 1.6   | 0.0070  | 0.0363 |         |        |         |                                                                                                          | bone-specific C/EBP-beta                                                                                                                                    |                                                                                                                                               |
| 2          | AI573368        | -       | 1396636  | 223039449     | Up        | 1.6   | 0.0034  | 0.0264 |         |        |         |                                                                                                          | Rattus norvegicus transcribed sequences                                                                                                                     |                                                                                                                                               |
| 2          | BI284800        | -       | 1371071  | 118791451     | Up        | 1.6   | 0.0226  | 0.1748 |         |        |         |                                                                                                          | Rattus norvegicus guanine nucleotide binding protein beta 4 subunit mRNA, partial cds                                                                       |                                                                                                                                               |
| 2          | BF406099        | -       | 1384824  | 138616556     | Up        | 1.5   | 0.0018  | 0.0604 |         |        |         |                                                                                                          | Rattus norvegicus transcribed sequences                                                                                                                     |                                                                                                                                               |
| 2          | BF398545        | Sh2c2   | 1396614  | 175479529     | Down      | 2.4   | 0.0047  | 0.0327 |         |        |         |                                                                                                          | secreted frizzled-related protein 3                                                                                                                         |                                                                                                                                               |
| 2          | AF140232        | S100a6  | 1367661  | 182895080     | Down      | 1.8   | 0.0481  | 0.2103 |         |        |         |                                                                                                          | calcium binding protein A6 (calpalcin)                                                                                                                      |                                                                                                                                               |
| 2          | NM_020538       | Ariad   | 1369462  | 149348935     | Down      | 1.7   | 0.0205  | 0.1716 |         |        |         |                                                                                                          | invariant (amide) diacylglycerol esterase                                                                                                                   |                                                                                                                                               |
| 2          | AA891529        | -       | 1382954  | 192441767     | Down      | 1.6   | 0.0021  | 0.0604 |         |        |         |                                                                                                          | Rattus norvegicus transcribed sequence with weak similarity to protein sp Q92664 (H.sapiens) TF3A, HUMAN Transcription factor IIIA (Factor A) (TFIIIA)      |                                                                                                                                               |
| 2          | NM_012618       | S100a4  | 1367846  | 182885070     | Down      | 1.6   | 0.0276  | 0.1858 |         |        |         |                                                                                                          | S100 calcium-binding protein A4                                                                                                                             |                                                                                                                                               |
| 2          | AI407385        | -       | 1371480  | 112227120     | Down      | 1.6   | 0.0219  | 0.1738 |         |        |         |                                                                                                          | Rattus norvegicus transcribed sequence with strong similarity to protein pI36670 (H.sapiens) A36670 cell division control protein Cks1 - human              |                                                                                                                                               |
| 2          | BF390321        | -       | 1392282  | 191399944     | Down      | 1.5   | 0.0110  | 0.1393 |         |        |         |                                                                                                          | Rattus norvegicus similar to hypothetical protein MGC46719 (LOC295283), mRNA                                                                                |                                                                                                                                               |
| 2          | BF553729        | Wnt2b   | 1397620  | 200219630     | Up        | 1.7   | 0.0012  | 0.0593 |         |        | 2.2     | 0.0000                                                                                                   | 0.0109                                                                                                                                                      | S100 calcium-binding protein A4                                                                                                               |
| 2          | AI554644        | Wnt2b   | 1394901  | 200215823     | Up        | 2.4   | 0.0055  | 0.0410 |         |        |         |                                                                                                          | Rattus norvegicus transcribed sequences                                                                                                                     |                                                                                                                                               |
| 2          | AI175140        | -       | 1384307  | 161953228     | Up        | 2.0   | 0.0040  | 0.0217 |         |        |         |                                                                                                          | Rattus norvegicus similar to histone protein Hist23C1 (LOC310679), mRNA                                                                                     |                                                                                                                                               |
| 2          | NM_033114       | S100a10 | 1388890  | 188645674     | Down      | 2.0   | 0.0470  | 0.2103 |         |        |         |                                                                                                          | S-100 related protein, clone A2C                                                                                                                            |                                                                                                                                               |
| 2          | AF084544        | Capo2   | 1371232  | 18712829      | Down      | 1.6   | 0.0424  | 0.2103 |         |        |         |                                                                                                          | chondroitin sulfate proteoglycan 2 (versican)                                                                                                               |                                                                                                                                               |
| 2          | AI556018        | -       | 1376996  | 231018070     | Down      | 1.6   | 0.0140  | 0.1496 |         |        | 1.6     | 0.0196                                                                                                   | 0.0632                                                                                                                                                      | Rattus norvegicus similar to KIAA1246 protein (LOC310859), mRNA                                                                               |
| 2          | NM_012769       | Gucy1b3 | 1389097  | 173684385     | Down      | 1.6   | 0.0151  | 0.1530 |         |        | 2.0     | 0.0026                                                                                                   | 0.0151                                                                                                                                                      | guanylate cyclase 1, soluble, beta 3                                                                                                          |
| 2          | BF399387        | Gucy1b3 | 1374389  | 173684385     | Down      | 1.5   | 0.0070  | 0.0279 |         |        | 1.7     | 0.0028                                                                                                   | 0.0327                                                                                                                                                      | guanylate cyclase 1, soluble, beta 3                                                                                                          |
| 2          | BI5374101       | -       | 1381262  | 181637899     | Up        | 3.6   | 0.0081  | 0.0977 |         |        | 2.7     | 0.0008                                                                                                   | 0.0099                                                                                                                                                      | Rattus norvegicus transcribed sequences                                                                                                       |
| 2          | AA909892        | -       | 1389811  | 152104473     | Up        | 2.6   | 0.0238  | 0.1768 |         |        | 2.2     | 0.0003                                                                                                   | 0.0072                                                                                                                                                      | Rattus norvegicus transcribed sequences                                                                                                       |
| 2          | AA900057        | Snx2    | 1379804  | 189474923     | Up        | 1.9   | 0.0062  | 0.0977 |         |        | 1.8     | 0.0015                                                                                                   | 0.0134                                                                                                                                                      | PDZ protein Mrt1                                                                                                                              |
| 2          | AI176320        | -       | 1373416  | 113315728     | Up        | 1.8   | 0.0012  | 0.0593 |         |        | 1.6     | 0.0048                                                                                                   | 0.0225                                                                                                                                                      | Rattus norvegicus transcribed sequences                                                                                                       |
| 2          | BF522863        | -       | 1386768  | 212890950     | Down      | 2.1   | 0.0057  | 0.0977 |         |        | 2.1     | 0.0033                                                                                                   | 0.0214                                                                                                                                                      | similarity to protein pdb 4GTU (H.sapiens) G Chain G, Ligand-Free Homodimeric Human Glutathione S-Transferase M4-4 (E.C.2.5.1.18)             |
| 2          | BI285782        | -       | 1375909  | 203060404     | Down      | 1.9   | 0.0020  |        |         |        |         |                                                                                                          |                                                                                                                                                             |                                                                                                                                               |

Table 1

| Chromosome | Gene Identifier | Gene ID   | Other ID     | Position (Mb) | Direction | Ratio | p-value | adj-p-value | Ratio  | p-value | adj-p-value | Direction | Ratio | p-value | adj-p-value | Gene Description                                                                                                                          |
|------------|-----------------|-----------|--------------|---------------|-----------|-------|---------|-------------|--------|---------|-------------|-----------|-------|---------|-------------|-------------------------------------------------------------------------------------------------------------------------------------------|
| 2          | AA816268        | -         | 1362274 at   | 157331763     | Up        |       | 1.8     | 0.0008      | 0.0097 | 2.3     | 0.0031      | 0.0327    |       |         |             | Retinoic acid receptor responder protein 1 (Tazartolene-induced gene 1 protein) (RAK-responsive protein TIG1) (LOC310486), mRNA           |
| 2          | AI111940        | -         | 13757594 at  | 160737614     | Up        |       | 1.7     | 0.0265      | 0.0616 | 1.9     | 0.0203      | 0.0327    |       |         |             | Rattus norvegicus similar to BCR4 aminesac-binding protein (LOC26213), mRNA                                                               |
| 2          | NM_021584       | -         | 1387276 at   | 144686423     | Down      |       | 2.0     | 0.0456      | 0.0840 | 2.8     | 0.0022      | 0.0327    |       |         |             | actin and neurotransmitter-induced early gene protein 4 (ania-4)                                                                          |
| 2          | BE102803        | -         | 1383867 at   | 118197860     | Down      |       | 1.9     | 0.0146      | 0.0432 | 1.9     | 0.0013      | 0.0292    |       |         |             | Rattus norvegicus similar to BIF-5A2 protein (LOC310281), mRNA                                                                            |
| 2          | BF490207        | -         | 1393263 at   | 118199119     | Down      |       | 1.7     | 0.0259      | 0.0241 | 0.303   | 0.0327      | 0.0327    |       |         |             | Rattus norvegicus transcribed sequences                                                                                                   |
| 2          | BE120508        | -         | 1319781 at   | 118931483     | Down      |       | 1.6     | 0.0209      | 0.0528 | 1.6     | 0.0443      | 0.0515    |       |         |             | Rattus norvegicus similar to BAF-53a (LOC381925), mRNA                                                                                    |
| 2          | NM_017020       | Irf7      | 1386987 at   | 182078051     | Down      |       | 1.5     | 0.0104      | 0.0351 | 1.8     | 0.0138      | 0.0549    |       |         |             | interleukin 6 receptor                                                                                                                    |
| 2          | BF411765        | Celr2     | 1371018 at   | 203960524     | Up        |       | 2.1     | 0.0002      | 0.0173 |         | 0.0002      | 0.0173    |       |         |             | cadherin EGF-LAG seven-pass C-type receptor 2                                                                                             |
| 2          | BF549971        | -         | 1377706 x at | 913063        | Up        |       | 1.9     | 0.0212      | 0.0847 |         |             | 0.0847    |       |         |             | ---                                                                                                                                       |
| 2          | AI112346        | -         | 1393952 at   | 89037914      | Up        |       | 1.8     | 0.0030      | 0.0327 |         |             | 0.0327    |       |         |             | Rattus norvegicus transcribed sequences                                                                                                   |
| 2          | AI137898        | -         | 1393330 at   | 84724179      | Up        |       | 1.8     | 0.0153      | 0.0574 |         |             | 0.0574    |       |         |             | Rattus norvegicus transcribed sequences                                                                                                   |
| 2          | BI284261        | -         | 1377869 at   | 140084501     | Up        |       | 1.7     | 0.0336      | 0.0802 |         |             | 0.0802    |       |         |             | Rattus norvegicus similar to carbon catabolite repression 4 protein homolog (LOC310395), mRNA                                             |
| 2          | BQ371895        | -         | 1383499 at   | 203756191     | Up        |       | 1.7     | 0.0098      | 0.0438 |         |             | 0.0438    |       |         |             | Rattus norvegicus transcribed sequences                                                                                                   |
| 2          | AI137642        | -         | 1393164 at   | 90341592      | Up        |       | 1.7     | 0.0311      | 0.0783 |         |             | 0.0783    |       |         |             | Rattus norvegicus similar to mitochondrial ribosomal protein S27 (LOC361883), mRNA                                                        |
| 2          | BI284747        | -         | 1390973 at   | 189597223     | Up        |       | 1.7     | 0.0490      | 0.0966 |         |             | 0.0966    |       |         |             | Rattus norvegicus similar to tripartite motif-containing 45 (LOC295323), mRNA                                                             |
| 2          | BQ374446        | -         | 1374760 at   | 80380796      | Up        |       | 1.6     | 0.0009      | 0.0232 |         |             | 0.0232    |       |         |             | Rattus norvegicus transcribed sequences                                                                                                   |
| 2          | AB021517        | -         | 1384653 at   | 218712747     | Down      |       | 1.6     | 0.0293      | 0.0740 |         |             | 0.0740    |       |         |             | Rattus norvegicus similar to ATP-binding cassette transporter (LOC310836), mRNA                                                           |
| 2          | BF284054        | Mccc1     | 1395844 at   | 122437985     | Up        |       | 1.6     | 0.0104      | 0.0493 |         |             | 0.0493    |       |         |             | Rattus norvegicus similar to methylcrotonoyl-Coenzyme A carboxylase 1 (alpha) (LOC294972), mRNA                                           |
| 2          | BE116137        | -         | 1378929 at   | 180446723     | Up        |       | 1.6     | 0.0493      | 0.0966 |         |             | 0.0966    |       |         |             | Rattus norvegicus transcribed sequences                                                                                                   |
| 2          | NM_130747       | rACH      | 1394945 at   | 21984949      | Up        |       | 1.6     | 0.0144      | 0.0554 |         |             | 0.0554    |       |         |             | cytosolic acyl-CoA hydrolase                                                                                                              |
| 2          | AI228548        | S100a1    | 1388459 at   | 182784683     | Up        |       | 1.6     | 0.0155      | 0.0575 |         |             | 0.0575    |       |         |             | Rattus norvegicus similar to S-100 protein, alpha chain (LOC295214), mRNA                                                                 |
| 2          | NM_024187       | Clf       | 1386205 at   | 227308841     | Down      |       | 4.0     | 0.0077      | 0.0463 |         |             | 0.0463    |       |         |             | complement factor 1                                                                                                                       |
| 2          | NM_031120       | Srs3      | 1360971 at   | 155149234     | Down      |       | 2.9     | 0.0062      | 0.0428 |         |             | 0.0428    |       |         |             | IRAP-complex gamma subunit                                                                                                                |
| 2          | BE109107        | -         | 1384969 at   | 243721308     | Down      |       | 2.5     | 0.0468      | 0.0946 |         |             | 0.0946    |       |         |             | Rattus norvegicus transcribed sequences                                                                                                   |
| 2          | NM_012932       | Cp        | 1368420 at   | 105086278     | Down      |       | 2.3     | 0.0170      | 0.0608 |         |             | 0.0608    |       |         |             | catenoplagmin                                                                                                                             |
| 2          | AF202115        | Cp        | 1368418 at   | 105086278     | Down      |       | 1.9     | 0.0529      | 0.0529 |         |             | 0.0529    |       |         |             | catenoplagmin                                                                                                                             |
| 2          | AF202115        | Cp        | 1368419 at   | 105086278     | Down      |       | 1.9     | 0.0090      | 0.0493 |         |             | 0.0493    |       |         |             | catenoplagmin                                                                                                                             |
| 2          | UP5675          | Fab       | 1373511 at   | 174767192     | Down      |       | 2.3     | 0.0106      | 0.0493 |         |             | 0.0493    |       |         |             | fibronectin, beta polypeptide                                                                                                             |
| 2          | BE290410        | -         | 1388052 at   | 581005566     | Down      |       | 2.2     | 0.0033      | 0.0327 |         |             | 0.0327    |       |         |             | Rattus norvegicus transcribed sequences                                                                                                   |
| 2          | AF367210        | Irf7      | 1389208 at   | 96356083      | Down      |       | 2.1     | 0.0041      | 0.0364 |         |             | 0.0364    |       |         |             | interleukin 7                                                                                                                             |
| 2          | AI170450        | -         | 1391587 at   | 77391890      | Down      |       | 2.1     | 0.0218      | 0.0653 |         |             | 0.0653    |       |         |             | Rattus norvegicus transcribed sequences                                                                                                   |
| 2          | NM_012889       | Vcam1     | 1388474 at   | 212227654     | Down      |       | 2.1     | 0.0051      | 0.0364 |         |             | 0.0364    |       |         |             | vascular cell adhesion molecule-1                                                                                                         |
| 2          | BE120370        | -         | 1384303 at   | 202489628     | Down      |       | 2.1     | 0.0058      | 0.0417 |         |             | 0.0417    |       |         |             | Rattus norvegicus transcribed sequences                                                                                                   |
| 2          | NM_059772       | Plk1      | 1389892 at   | 96824399      | Down      |       | 2.0     | 0.0426      | 0.0893 |         |             | 0.0893    |       |         |             | protein kinase inhibitor, alpha                                                                                                           |
| 2          | AA803743        | Plk1      | 1382176 at   | 96821745      | Down      |       | 2.0     | 0.0024      | 0.0327 |         |             | 0.0327    |       |         |             | protein kinase inhibitor, alpha                                                                                                           |
| 2          | AW528452        | -         | 1381688 at   | 236389754     | Down      |       | 2.0     | 0.0275      | 0.0740 |         |             | 0.0740    |       |         |             | Rattus norvegicus transcribed sequences                                                                                                   |
| 2          | BF283984        | -         | 1379444 at   | 171388285     | Down      |       | 1.9     | 0.0111      | 0.0501 |         |             | 0.0501    |       |         |             | Rattus norvegicus transcribed sequences                                                                                                   |
| 2          | BE109744        | -         | 1392852 at   | 180627289     | Down      |       | 1.9     | 0.0028      | 0.0327 |         |             | 0.0327    |       |         |             | Rattus norvegicus similar to transcription repressor p66 (LOC310814), mRNA                                                                |
| 2          | BM385061        | -         | 1391106 at   | 56981705      | Down      |       | 1.9     | 0.0124      | 0.0528 |         |             | 0.0528    |       |         |             | Rattus norvegicus transcribed sequences                                                                                                   |
| 2          | BF282631        | C7        | 1383291 at   | 54144754      | Down      |       | 1.9     | 0.0273      | 0.0736 |         |             | 0.0736    |       |         |             | Rattus norvegicus similar to Complement component C7 precursor (LOC310126), mRNA                                                          |
| 2          | BI27436         | -         | 1393169 at   | 219714168     | Down      |       | 1.9     | 0.0292      | 0.0792 |         |             | 0.0792    |       |         |             | similarity to protein ar-RGECDW (E. coli) RGECDW transcription activator of D-serine dehydratase - Escherichia coli                       |
| 2          | BI27472         | -         | 1390404 at   | 213164026     | Down      |       | 1.8     | 0.0426      | 0.0946 |         |             | 0.0946    |       |         |             | Rattus norvegicus transcribed sequences                                                                                                   |
| 2          | BI282029        | -         | 1395388 at   | 88552849      | Down      |       | 1.8     | 0.0336      | 0.0802 |         |             | 0.0802    |       |         |             | Rattus norvegicus transcribed sequences                                                                                                   |
| 2          | AA957364        | Ibaa1     | 1372728 at   | 47172364      | Down      |       | 1.8     | 0.0072      | 0.0448 |         |             | 0.0448    |       |         |             | microRNA-1                                                                                                                                |
| 2          | NM_030964       | Ibaa1     | 1387744 at   | 47107864      | Down      |       | 1.8     | 0.0166      | 0.0596 |         |             | 0.0596    |       |         |             | microRNA-1                                                                                                                                |
| 2          | M67405          | Galcyl1a3 | 1387079 at   | 173750007     | Down      |       | 1.8     | 0.0003      | 0.0173 |         |             | 0.0173    |       |         |             | quadrifate cyclase 1, soluble, alpha 3                                                                                                    |
| 2          | NM_019225       | Slic1a3   | 1389895 at   | 98270236      | Down      |       | 1.8     | 0.0286      | 0.0747 |         |             | 0.0747    |       |         |             | solute carrier family 1, member 3                                                                                                         |
| 2          | AW528269        | -         | 1379691 at   | 383837        | Down      |       | 1.8     | 0.0093      | 0.0327 |         |             | 0.0327    |       |         |             | Rattus norvegicus retroviral-like C-Ha-ras proto-oncogene mRNA, partial sequence                                                          |
| 2          | AI237532        | -         | 1385872 at   | 152125382     | Down      |       | 1.8     | 0.0002      | 0.0173 |         |             | 0.0173    |       |         |             | Rattus norvegicus transcribed sequences                                                                                                   |
| 2          | UP7887          | Ania4     | 1398985 at   | 144267748     | Down      |       | 1.7     | 0.0080      | 0.0475 |         |             | 0.0475    |       |         |             | actin and neurotransmitter-induced early gene protein 4 (ania-4)                                                                          |
| 2          | BF284922        | -         | 1393985 at   | 118026379     | Down      |       | 1.7     | 0.0108      | 0.0493 |         |             | 0.0493    |       |         |             | Rattus norvegicus similar to osteoblast specific factor 2 precursor (LOC381945), mRNA                                                     |
| 2          | BM389026        | -         | 1373911 at   | 143531710     | Down      |       | 1.7     | 0.0149      | 0.0565 |         |             | 0.0565    |       |         |             | Rattus norvegicus similar to osteoblast specific factor 2 precursor (LOC381945), mRNA                                                     |
| 2          | AW52618         | -         | 1378133 at   | 139240746     | Down      |       | 1.7     | 0.0369      | 0.0845 |         |             | 0.0845    |       |         |             | Rattus norvegicus transcribed sequences                                                                                                   |
| 2          | AA858564        | -         | 1379942 at   | 100989394     | Down      |       | 1.7     | 0.0045      | 0.0376 |         |             | 0.0376    |       |         |             | Rattus norvegicus transcribed sequences                                                                                                   |
| 2          | BE108581        | -         | 1382746 x at | 224929644     | Down      |       | 1.7     | 0.0211      | 0.0647 |         |             | 0.0647    |       |         |             | Rattus norvegicus transcribed sequences                                                                                                   |
| 2          | BI281702        | Map1b     | 1373363 at   | 30415255      | Down      |       | 1.7     | 0.0341      | 0.0803 |         |             | 0.0803    |       |         |             | microtubule-associated protein 1b                                                                                                         |
| 2          | AA851404        | -         | 1391501 at   | 158802615     | Down      |       | 1.7     | 0.0029      | 0.0327 |         |             | 0.0327    |       |         |             | Rattus norvegicus similar to RIKEN cDNA 4921524P20 (LOC298106), mRNA                                                                      |
| 2          | AI409635        | -         | 1375029 at   | 179487312     | Down      |       | 1.7     | 0.0172      | 0.0609 |         |             | 0.0609    |       |         |             | similarity to protein dcD1 (E. coli) B Chain B. Lactose Operon Repressor Bound to 21-Base Pair Symmetric Operator Dna. Alpha Carbons Only |
| 2          | BI282167        | Cdh6      | 1378480 at   | 62543102      | Down      |       | 1.6     | 0.0497      | 0.0966 |         |             | 0.0966    |       |         |             | Rattus norvegicus transcribed sequences                                                                                                   |
| 2          | AA864378        | Cdh6      | 1378614 at   | 62544084      | Down      |       | 1.6     | 0.0154      | 0.0574 |         |             | 0.0574    |       |         |             | Rattus norvegicus transcribed sequences                                                                                                   |
| 2          | AI574991        | -         | 1379356 at   | 204567499     | Down      |       | 1.6     | 0.0019      | 0.0325 |         |             | 0.0325    |       |         |             | Rattus norvegicus transcribed sequences                                                                                                   |
| 2          | NM_019243       | Platn     | 1387986 at   | 18601505      | Down      |       | 1.6     | 0.0228      | 0.0687 |         |             | 0.0687    |       |         |             | crocataldin F2 receptor, negative regulator                                                                                               |
| 2          | BM38077         | -         | 1393146 at   | 144831076     | Down      |       | 1.6     | 0.0075      | 0.0376 |         |             | 0.0376    |       |         |             | Rattus norvegicus transcribed sequences                                                                                                   |
| 2          | AA859029        | -         | 1393751 at   | 93469787      | Down      |       | 1.6     | 0.0531      | 0.127  |         |             | 0.127     |       |         |             | similarity to protein gp-P0072 (E. coli) [GAL, ECOLI] Beta-galactosidase (Lactase)                                                        |
| 2          | AI178422        | -         | 1381771 at   | 148600812     | Down      |       | 1.6     | 0.0491      | 0.0966 |         |             | 0.0966    |       |         |             | Rattus norvegicus transcribed sequences                                                                                                   |
| 2          | AW191545        | -         | 1392254 at   | 27599983      | Down      |       | 1.6     | 0.0016      | 0.0323 |         |             | 0.0323    |       |         |             | ---                                                                                                                                       |
| 2          | BM385126        | -         | 1394545 at   | 4899          | Down      |       | 1.6     | 0.0456      | 0.0912 |         |             | 0.0912    |       |         |             | ---                                                                                                                                       |
| 2          | BM389035        | -         | 1378453 at   | 47107864      | Down      |       | 1.6     | 0.0477      | 0.0957 |         |             | 0.0957    |       |         |             | Rattus norvegicus transcribed sequences                                                                                                   |
| 2          | AA851345        | -         | 1391979 at   | 56891395      | Down      |       | 1.6     | 0.0494      | 0.0966 |         |             | 0.0966    |       |         |             | Rattus norvegicus transcribed sequences                                                                                                   |
| 2          | BI282008        | -         | 1389003 at   | 2911103       | Down      |       | 1.6     | 0.0005      | 0.0182 |         |             | 0.0182    |       |         |             | Rattus norvegicus transcribed sequences                                                                                                   |
| 2          | BE102821        | -         | 1378153 at   | 140408472     | Down      |       | 1.5     | 0.0197      | 0.0632 |         |             | 0.0632    |       |         |             | Rattus norvegicus transcribed sequences                                                                                                   |
| 2          | AW528269        | -         | 1386100 at   | 11606188      | Down      |       | 1.5     | 0.0198      | 0.0632 |         |             | 0.0632    |       |         |             | similar to misshapen/NIK-related kinase isoform 2; GCK family kinase MINK; serine/threonine protein kinase (LOC294917), mRNA              |
| 2          | NM_012716       | Sic1b1    | 1386681 at   | 159860337     | Down      |       | 1.5     | 0.0001      | 0.0011 |         |             | 0.0011    |       |         |             | solute carrier family 16, member 1                                                                                                        |
| 2          | AI102620        | Map3k1    | 1375673 at   | 43062252      | Down      |       | 1.5     | 0.0177      | 0.0614 |         |             | 0.0614    |       |         |             |                                                                                                                                           |

Table 1

| Chromosome | Gene Identifier | Gene ID   | Other ID   | Position (Mb) | Direction | Ratio | Week4   |             | Week12 |         | Week20      |       | Gene Description                                                                                                              |         |                                                                                                                                            |
|------------|-----------------|-----------|------------|---------------|-----------|-------|---------|-------------|--------|---------|-------------|-------|-------------------------------------------------------------------------------------------------------------------------------|---------|--------------------------------------------------------------------------------------------------------------------------------------------|
|            |                 |           |            |               |           |       | p-value | adj-p-value | Ratio  | p-value | adj-p-value | Ratio |                                                                                                                               | p-value | adj-p-value                                                                                                                                |
| 3          | BF415891        | -         | 1362441 at | 25564295      | Down      | 1.5   | 0.0021  | 0.0804      |        |         |             |       | similarity to protein sp.06015 (H. sapiens) SIF1_HUMAN Zinc finger homeobox protein 1b (Smad interacting protein 1) (SMAD1P1) |         |                                                                                                                                            |
| 3          | BF54887         | -         | 1365153 at | 96911095      | Down      |       |         |             | 1.7    | 0.0303  | 0.0635      |       | Rattus norvegicus transcribed sequences                                                                                       |         |                                                                                                                                            |
| 3          | NM_133572       | Cdc25b    | 1370034 at | 118893716     | Down      |       |         |             | 3.0    | 0.0040  | 0.0217      | 1.5   | 0.0142                                                                                                                        | 0.0551  | cell division cycle 25B                                                                                                                    |
| 3          | AJ234249        | -         | 1374630 at | 36223883      | Up        |       |         |             | 1.7    | 0.0375  | 0.0846      |       |                                                                                                                               |         | Rattus norvegicus similar to chloride intracellular channel 3 (LOC366566). mRNA                                                            |
| 3          | NM_017092       | Twp3      | 1375793 at | 110339871     | Up        |       |         |             | 1.8    | 0.0343  | 0.0372      |       |                                                                                                                               |         | Tyrosin protein kinase kinase 3                                                                                                            |
| 3          | AJ071620        | -         | 1385580 at | 142009065     | Up        |       |         |             | 1.6    | 0.0476  | 0.0957      |       |                                                                                                                               |         | Rattus norvegicus transcribed sequences                                                                                                    |
| 3          | BF75292         | -         | 1377088 at | 142260679     | Up        |       |         |             | 1.6    | 0.0202  | 0.0327      |       |                                                                                                                               |         | Rattus norvegicus similar to RIKEN cDNA 2310046K01 (LOC311536). mRNA                                                                       |
| 3          | NM_134403       | Ahr2      | 138111 at  | 86853338      | Down      |       |         |             | 1.6    | 0.0029  | 0.0327      |       |                                                                                                                               |         | Cytochrome P450                                                                                                                            |
| 3          | AF-067650       | Sardh     | 1370573 at | 6075853       | Up        |       |         |             | 1.5    | 0.0211  | 0.0647      |       |                                                                                                                               |         | sarcosine dehydrogenase                                                                                                                    |
| 3          | BE105446        | Fnbp1     | 1377342 at | 10091465      | Up        |       |         |             | 1.5    | 0.0275  | 0.0736      |       |                                                                                                                               |         | racalmin                                                                                                                                   |
| 3          | BC06106         | -         | 1383307 at | 75309098      | Down      |       |         |             | 1.5    | 0.0343  | 0.0654      |       |                                                                                                                               |         | Rattus norvegicus similar to nicotinic acetylcholine receptor-associated 46K protein - mouse (LOC362161). mRNA                             |
| 3          | NM_031055       | Mmp9      | 1398275 at | 155995473     | Up        |       |         |             | 1.5    | 0.0208  | 0.0646      |       |                                                                                                                               |         | matrix metalloproteinase 9 (gelatinase B, 92-kDa type IV collagenase)                                                                      |
| 3          | BI294934        | -         | 1380612 at | 169762453     | Down      |       |         |             | 1.6    | 0.0174  | 0.0610      |       |                                                                                                                               |         | Rattus norvegicus transcribed sequences                                                                                                    |
| 3          | BF543871        | -         | 1384382 at | 44547884      | Down      |       |         |             | 1.6    | 0.0167  | 0.0598      |       |                                                                                                                               |         | Rattus norvegicus transcribed sequences                                                                                                    |
| 3          | BF565756        | -         | 1388695 at | 42002053      | Down      |       |         |             | 1.6    | 0.0201  | 0.0639      |       |                                                                                                                               |         | Rattus norvegicus transcribed sequences                                                                                                    |
| 3          | BF542618        | -         | 1394845 at | 100002831     | Down      |       |         |             | 1.5    | 0.0068  | 0.0448      |       |                                                                                                                               |         | Rattus norvegicus similar to mKIAA9560 protein (LOC366183). mRNA                                                                           |
| 3          | BF552077        | -         | 1372307 at | 112303545     | Down      |       |         |             | 1.5    | 0.0364  | 0.0837      |       |                                                                                                                               |         | Rattus norvegicus similar to Na-Ca exchanger 5 (LOC313387). mRNA                                                                           |
| 3          | AJ012697        | -         | 1377072 at | 94611907      | Up        | 1.6   | 0.0159  | 0.1557      |        |         |             |       |                                                                                                                               |         | similarity to protein ref.NP_002680.1 (H. sapiens) polymerase (DNA-directed), alpha (TK01) [Homo sapiens]                                  |
| 4          | BF397628        | -         | 1396422 at | 121746928     | Up        | 1.6   | 0.0228  | 0.1748      |        |         |             |       |                                                                                                                               |         | protein kinase, transmembrane type 12                                                                                                      |
| 4          | NM_057115       | Phn12     | 1369496 at | 9617633       | Down      | 1.6   | 0.0601  | 0.0372      |        |         |             |       |                                                                                                                               |         | protein kinase (phosphatase, non-receptor) type 12                                                                                         |
| 4          | AJ011345        | Prknk1    | 1391140 at | 156297841     | Down      | 1.7   | 0.0372  | 0.2071      |        |         |             |       |                                                                                                                               |         | CASA transcription factor 1                                                                                                                |
| 4          | BE116205        | -         | 1384795 at | 118125137     | Down      | 1.7   | 0.0283  | 0.1877      |        |         |             |       |                                                                                                                               |         | Rattus norvegicus similar to nuclear protein, NP220 (LOC312491). mRNA                                                                      |
| 4          | BE109884        | -         | 1379651 at | 133722289     | Down      | 1.7   | 0.0306  | 0.1906      |        |         |             |       |                                                                                                                               |         | Rattus norvegicus similar to forkhead-related transcription factor 1A (LOC287480). mRNA                                                    |
| 4          | BC070960        | MGC95152  | 1395919 at | 83981797      | Down      | 1.6   | 0.0443  | 0.2103      |        |         |             |       |                                                                                                                               |         | Rattus norvegicus similar to R32020.0L019K protein (LOC297100). mRNA                                                                       |
| 4          | BE115521        | -         | 1391170 at | 148981770     | Down      | 1.6   | 0.0472  | 0.2103      |        |         |             |       |                                                                                                                               |         | Rattus norvegicus similar to mKIAA1757 protein (LOC297514). mRNA                                                                           |
| 4          | AJ714037        | -         | 1384729 at | 156334911     | Down      | 1.6   | 0.0088  | 0.1249      |        |         |             |       |                                                                                                                               |         | Rattus norvegicus transcribed sequences                                                                                                    |
| 4          | NM_017335       | Sicr12    | 1397295 at | 577151292     | Down      | 1.5   | 0.0414  | 0.2103      |        |         |             |       |                                                                                                                               |         | CASA transcription factor 2                                                                                                                |
| 4          | AJ529483        | -         | 1378365 at | 117432385     | Down      | 1.9   | 0.0138  | 0.1498      | 1.6    | 0.0218  | 0.0538      |       |                                                                                                                               |         | Rattus norvegicus transcribed sequences                                                                                                    |
| 4          | AJ385379        | -         | 1398107 at | 83462077      | Down      | 1.9   | 0.0455  | 0.0840      |        |         |             |       |                                                                                                                               |         | Rattus norvegicus similar to RIKEN cDNA A030007L17; EST: AA673177 (LOC362370). mRNA                                                        |
| 4          | BI211290        | -         | 1394963 at | 43309017      | Down      |       |         |             | 1.8    | 0.0124  | 0.0395      |       |                                                                                                                               |         | Rattus norvegicus transcribed sequences                                                                                                    |
| 4          | AJ548449        | -         | 1384851 at | 94549854      | Up        |       |         |             |        |         |             | 1.7   | 0.0131                                                                                                                        | 0.0540  | similarity to protein ref.NP_064544.1 (H. sapiens) hypothetical protein DKFZ6762K2015 (Homo sapiens)                                       |
| 4          | BF400819        | Gain11    | 1396602 at | 5272176       | Up        |       |         |             | 1.6    | 0.0069  | 0.0448      |       |                                                                                                                               |         | Rattus norvegicus transcribed sequences                                                                                                    |
| 4          | AJ181344        | Onb5      | 1370961 at | 14995495      | Up        |       |         |             | 1.6    | 0.0204  | 0.0648      |       |                                                                                                                               |         | camelinolase 3                                                                                                                             |
| 4          | AF023090        | -         | 1372293 at | 8964935       | Up        |       |         |             | 1.6    | 0.0178  | 0.0614      |       |                                                                                                                               |         | Rattus norvegicus transcribed sequences                                                                                                    |
| 4          | AJ235658        | -         | 1383023 at | 57124082      | Up        |       |         |             | 1.6    | 0.0380  | 0.0846      |       |                                                                                                                               |         | similar to Ubiquitin-conjugating enzyme E2 H (Ubiquitin-protein ligase H) (Ubiquitin carrier protein H) (UBCH2) (E2-20K) (LOC296956). mRNA |
| 4          | AJ232716        | -         | 1373913 at | 83934016      | Down      |       |         |             | 1.6    | 0.0270  | 0.0846      |       |                                                                                                                               |         | Rattus norvegicus transcribed sequences                                                                                                    |
| 4          | AJ230054        | -         | 1373902 at | 158801835     | Up        |       |         |             | 1.5    | 0.0288  | 0.0749      |       |                                                                                                                               |         | Rattus norvegicus similar to hypothetical protein MGC47816 (LOC302038). mRNA                                                               |
| 4          | AA848944        | -         | 1379584 at | 168128286     | Down      | 2.1   | 0.0267  | 0.0712      |        |         |             |       |                                                                                                                               |         | Rattus norvegicus transcribed sequences                                                                                                    |
| 4          | AA690113        | -         | 1382083 at | 80865142      | Down      | 2.1   | 0.0147  | 0.0512      |        |         |             |       |                                                                                                                               |         | similar to protein ref.AJ23284 (H. sapiens) A57384 multimerin, endothelial cell, precursor - human                                         |
| 4          | AJ915454        | -         | 1376394 at | 186697703     | Down      | 1.9   | 0.0188  | 0.0629      |        |         |             |       |                                                                                                                               |         | Rattus norvegicus transcribed sequences                                                                                                    |
| 4          | UJ68883         | Kfra5     | 1370740 at | 168840017     | Down      |       |         |             | 1.6    | 0.0110  | 0.0500      |       |                                                                                                                               |         | Ly-49.9 antigen                                                                                                                            |
| 4          | AJ716184        | Fgfr2     | 1372884 at | 91783133      | Down      | 1.7   | 0.0030  | 0.0330      |        |         |             |       |                                                                                                                               |         | fibroblast growth factor receptor 2                                                                                                        |
| 4          | NM_013080       | Hhr23     | 1368350 at | 43534202      | Down      | 1.7   | 0.0003  | 0.0173      |        |         |             |       |                                                                                                                               |         | Rattus norvegicus similar to theother 5-methyltransferase (LOC297114). mRNA                                                                |
| 4          | BM392106        | Cald1     | 1368824 at | 62062872      | Down      | 1.6   | 0.0069  | 0.0448      |        |         |             |       |                                                                                                                               |         | Rattus norvegicus similar to talin 2 (LOC315776). mRNA                                                                                     |
| 4          | BI291848        | Gnid1     | 1371969 at | 62062872      | Down      | 1.6   | 0.0143  | 0.0564      |        |         |             |       |                                                                                                                               |         | calcaldinin 1                                                                                                                              |
| 4          | AJ140952        | Cfrcan2d1 | 1396849 at | 153398718     | Down      | 1.6   | 0.0108  | 0.0467      |        |         |             |       |                                                                                                                               |         | calcium channel, voltage-dependent, alpha2delta subunit 1                                                                                  |
| 4          | BF281550        | -         | 1390810 at | 25065233      | Down      |       |         |             | 1.6    | 0.0197  | 0.0632      |       |                                                                                                                               |         | Rattus norvegicus transcribed sequences                                                                                                    |
| 4          | AA943147        | -         | 1382802 at | 87279682      | Down      |       |         |             | 1.6    | 0.0043  | 0.0372      |       |                                                                                                                               |         | Rattus norvegicus similar to hypothetical protein FLJ20637 (LOC362376). mRNA                                                               |
| 4          | AJ694045        | -         | 1398933 at | 171879448     | Up        | 1.7   | 0.0028  | 0.0711      |        |         |             |       |                                                                                                                               |         | Rattus norvegicus similar to R6511 homolog (LOC298878). mRNA                                                                               |
| 4          | BF401989        | Neoa2     | 1396254 at | 5248682       | Up        | 1.6   | 0.0442  | 0.2103      |        |         |             |       |                                                                                                                               |         | Rattus norvegicus transcribed sequences                                                                                                    |
| 4          | AA909447        | -         | 1382715 at | 96407867      | Up        | 1.6   | 0.0118  | 0.1401      |        |         |             |       |                                                                                                                               |         | Rattus norvegicus similar to cysteine-rich protein NF-X-1 (LOC313166). mRNA                                                                |
| 4          | AJ111618        | MGC105681 | 1373063 at | 56658101      | Down      | 2.0   | 0.0062  | 0.2103      |        |         |             |       |                                                                                                                               |         | Rattus norvegicus similar to C10 G chain (LOC362854). mRNA                                                                                 |
| 4          | BM386775        | -         | 1379228 at | 152821172     | Down      | 1.6   | 0.0368  | 0.2071      |        |         |             |       |                                                                                                                               |         | Rattus norvegicus similar to absent in melanoma 1 (LOC298543). mRNA                                                                        |
| 4          | NM_053718       | Mll3      | 1388279 at | 107070479     | Down      | 1.5   | 0.0431  | 0.2103      |        |         |             |       |                                                                                                                               |         | (myeloid/lymphoid or mixed-lineage leukemia (fms/retroviral) (Drosophila) homolog; translocated to 3                                       |
| 4          | BI211980        | -         | 1371291 at | 168128286     | Down      |       |         |             | 1.5    | 0.0294  | 0.0629      |       |                                                                                                                               |         | Rattus norvegicus transcribed sequences                                                                                                    |
| 4          | XJ5812          | Cnr1      | 1369677 at | 50427173      | Down      |       |         |             | 1.6    | 0.0151  | 0.0433      |       |                                                                                                                               |         | canabinoid receptor 1                                                                                                                      |
| 4          | BI278779        | Slc30a2   | 1378896 at | 163087073     | Up        | 2.0   | 0.0032  | 0.0327      |        |         |             |       |                                                                                                                               |         | solute carrier family 30, member 2                                                                                                         |
| 4          | NM_012980       | Slc30a2   | 1380264 at | 163087073     | Up        | 1.9   | 0.0192  | 0.0630      |        |         |             |       |                                                                                                                               |         | solute carrier family 30, member 2                                                                                                         |
| 4          | BM384214        | Maih1     | 1380579 at | 148905644     | Up        | 1.6   | 0.0005  | 0.0182      |        |         |             |       |                                                                                                                               |         | Rattus norvegicus similar to Matrilin 1, cartilage matrix protein 1 (LOC297894). mRNA                                                      |
| 4          | BF284337        | -         | 1373963 at | 79494958      | Up        | 1.6   | 0.0099  | 0.0493      |        |         |             |       |                                                                                                                               |         | Rattus norvegicus similar to RIKEN cDNA 281043D12 (LOC298097). mRNA                                                                        |
| 4          | NM_021883       | Ox1       | 1390259 at | 129385247     | Up        | 1.6   | 0.0025  | 0.0327      |        |         |             |       |                                                                                                                               |         | deoxianilic acid oxidase, type 1                                                                                                           |
| 4          | AJ145487        | -         | 1393945 at | 40708424      | Down      | 2.2   | 0.0072  | 0.0448      |        |         |             |       |                                                                                                                               |         | Rattus norvegicus transcribed sequences                                                                                                    |
| 4          | NM_053977       | Cohn17    | 1389224 at | 26047160      | Down      | 1.9   | 0.0126  | 0.0532      |        |         |             |       |                                                                                                                               |         | cadherin 17                                                                                                                                |
| 4          | AJ209669        | Gnb1      | 1382962 at | 172386934     | Down      | 1.7   | 0.0035  | 0.0331      |        |         |             |       |                                                                                                                               |         | Rattus norvegicus transcribed sequences                                                                                                    |
| 4          | BF396154        | -         | 1378142 at | 129921739     | Down      |       |         |             | 1.6    | 0.0198  | 0.0632      |       |                                                                                                                               |         | Rattus norvegicus transcribed sequences                                                                                                    |
| 4          | AJ103530        | -         | 1382431 at | 70490031      | Down      |       |         |             | 1.6    | 0.0041  | 0.0365      |       |                                                                                                                               |         | similarity to protein sp.O95477 (H. sapiens) ABC1_HUMAN ATP-binding cassette, sub-family A, member 1 (ATP-binding cassette transporter 1)  |
| 4          | BF397628        | -         | 1391139 at | 105474702     | Down      |       |         |             | 1.6    | 0.0387  | 0.0857      |       |                                                                                                                               |         | Rattus norvegicus transcribed sequences                                                                                                    |
| 4          | BE115159        | -         | 1384059 at | 102264948     | Down      |       |         |             | 1.6    | 0.0000  | 0.0109      |       |                                                                                                                               |         | Rattus norvegicus transcribed sequences                                                                                                    |
| 4          | AA874945        | -         | 1382967 at | 12379423      | Down      | 1.5   | 0.0128  | 0.0535      |        |         |             |       |                                                                                                                               |         | Rattus norvegicus transcribed sequences                                                                                                    |
| 4          | AA958428        | -         | 1381895 at | 96509955      | Down      | 1.6   | 0.0062  | 0.1626      |        |         |             |       |                                                                                                                               |         | Rattus norvegicus transcribed sequences                                                                                                    |
| 4          | BF396286        | -         | 1397015 at | 57765343      | Down      | 2.1   | 0.0309  | 0.1906      |        |         |             |       |                                                                                                                               |         | Rattus norvegicus transcribed sequences                                                                                                    |
| 4          | BE116294        | -         | 1396263 at | 51807151      | Down      | 1.8   | 0.0098  | 0.1324      |        |         |             |       |                                                                                                                               |         | Rattus norvegicus transcribed sequences                                                                                                    |
| 4          | BI303268        | Bzw2      | 1370298 at | 94817272      | Down      | 1.7   | 0.0444  | 0.2103      |        |         |             |       |                                                                                                                               |         | HbZ protein                                                                                                                                |
| 4          | BI378236        | -         | 1372564 at | 40265862      | Down      | 1.6   | 0.0330  | 0.1971      |        |         |             |       |                                                                                                                               |         | Rattus norvegicus similar to Kiso0575 (LOC313977). mRNA                                                                                    |
| 4          | BM384008        | -         | 1382864 at | 72885228      | Down      | 1.6   | 0.0020  | 0.0604      |        |         |             |       |                                                                                                                               |         | Rattus norvegicus similar to p190-B (LOC299012). mRNA                                                                                      |
| 4          | NM_019163       | Psen1     | 1388782 at | 107725733     | Down      | 1.6   | 0.0091  | 0.2103      |        |         |             |       |                                                                                                                               |         | presenilin 1                                                                                                                               |
| 4          | BM385731        | -         | 1385609 at | 42217273      | Up        | 2.2   | 0.0034  | 0.0764      | 2.1    | 0.0118  | 0.0383      |       |                                                                                                                               |         | presenilin 1                                                                                                                               |
| 4          | BM383749        | -         | 1378128 at | 42262080      | Up        | 2.0   | 0.0183  | 0.1640      | 1.6    | 0.0386  | 0.0746      |       |                                                                                                                               |         |                                                                                                                                            |





Table 1

| Chromosome | Gene Identifier | Gene ID   | Other ID     | Position (Mb) | Direction | Ratio | Week4   |            | Week12 |         | Week20     |        | Gene Description |                                                                                                                                                                   |                                                                                                                                      |
|------------|-----------------|-----------|--------------|---------------|-----------|-------|---------|------------|--------|---------|------------|--------|------------------|-------------------------------------------------------------------------------------------------------------------------------------------------------------------|--------------------------------------------------------------------------------------------------------------------------------------|
|            |                 |           |              |               |           |       | p-value | adjp-value | Ratio  | p-value | adjp-value | Ratio  |                  | p-value                                                                                                                                                           | adjp-value                                                                                                                           |
| 11         | AA989697        | -         | 1384122 a.t  | 70386039      | Down      |       |         |            |        |         | 1.6        | 0.0204 | 0.0639           | Rattus norvegicus transcribed sequences                                                                                                                           |                                                                                                                                      |
| 11         | AA650765        | -         | 1384724 a.t  | 25263390      | Down      |       |         |            |        |         | 1.6        | 0.0216 | 0.047            | Rattus norvegicus transcribed sequences                                                                                                                           |                                                                                                                                      |
| 11         | BG669292        | -         | 1388879 a.t  | 44854445      | Down      |       |         |            |        |         | 1.6        | 0.0313 | 0.0764           | Rattus norvegicus similar to 503341B22Rik protein (LOC363767), mRNA                                                                                               |                                                                                                                                      |
| 11         | BF561284        | -         | 1393285 a.t  | 2390377       | Down      |       |         |            |        |         | 1.6        | 0.0251 | 0.0709           | ---                                                                                                                                                               |                                                                                                                                      |
| 11         | BE105691        | -         | 1390443 a.t  | 17441730      | Down      |       |         |            |        |         | 1.6        | 0.0343 | 0.0834           | Rattus norvegicus transcribed sequences                                                                                                                           |                                                                                                                                      |
| 11         | U31584          | Laamp     | 1370550 a.t  | 60165324      | Down      |       |         |            |        |         | 1.6        | 0.0003 | 0.0173           | limb3-associated membrane protein                                                                                                                                 |                                                                                                                                      |
| 11         | BM339685        | -         | 1378937 a.t  | 43764257      | Down      |       |         |            |        |         | 1.6        | 0.0497 | 0.0986           | Rattus norvegicus similar to downregulated in ovarian cancer 1 (LOC304020), mRNA                                                                                  |                                                                                                                                      |
| 11         | BI303277        | -         | 1382025 a.t  | 2390377       | Down      |       |         |            |        |         | 1.6        | 0.0406 | 0.0726           | Rattus norvegicus transcribed sequences                                                                                                                           |                                                                                                                                      |
| 11         | BE109290        | Digh1     | 1397135 a.t  | 70775877      | Down      |       |         |            |        |         | 1.5        | 0.0192 | 0.0630           | Rattus norvegicus transcribed sequences                                                                                                                           |                                                                                                                                      |
| 11         | BF368632        | -         | 1385742 a.t  | 86161377      | Down      |       |         |            |        |         | 1.5        | 0.0400 | 0.0876           | ---                                                                                                                                                               |                                                                                                                                      |
| 12         | NM_053962       | Ssa       | 1389884 a.t  | 137281250     | Down      | 1.9   | 0.0278  | 0.1860     |        |         |            |        |                  | serine dehydratase                                                                                                                                                |                                                                                                                                      |
| 12         | BE103748        | -         | 1392941 a.t  | 22421151      | Down      | 1.6   | 0.0297  | 0.1894     |        |         |            |        |                  | Rattus norvegicus transcribed sequences                                                                                                                           |                                                                                                                                      |
| 12         | AW531730        | -         | 1394764 a.t  | 10757471      | Up        |       |         |            |        |         | 1.7        | 0.0108 | 0.0588           | Rattus norvegicus similar to kinase phosphatase inhibitor 2 (LOC304286), mRNA                                                                                     |                                                                                                                                      |
| 12         | AI235340        | -         | 1384634 a.t  | 43273320      | Down      |       |         |            |        |         | 1.7        | 0.0309 | 0.0640           | Rattus norvegicus transcribed sequences                                                                                                                           |                                                                                                                                      |
| 12         | BF288115        | -         | 1376688 a.t  | 19885349      | Down      |       |         |            |        |         | 1.6        | 0.0148 | 0.0432           | Rattus norvegicus similar to paired immunoglobulin-like type 2 receptor alpha, cell surface receptor FDF03 (LOC288552), mRNA                                      |                                                                                                                                      |
| 12         | BF521655        | -         | 1385670 a.t  | 37302260      | Up        |       |         |            |        |         | 1.5        | 0.0184 | 0.0622           | Rattus norvegicus similar to serine dehydratase related sequence 1 (LOC360816), mRNA                                                                              |                                                                                                                                      |
| 12         | AI995117        | -         | 1381431 a.t  | 84144         | Down      |       |         |            |        |         | 1.5        | 0.0336 | 0.0802           | Rattus norvegicus transcribed sequences                                                                                                                           |                                                                                                                                      |
| 13         | NM_031118       | Seaf1     | 1399002 a.t  | 71420882      | Down      | 2.3   | 0.0402  | 0.2103     |        |         |            |        |                  | Rattus norvegicus transcribed sequences                                                                                                                           |                                                                                                                                      |
| 13         | NM_053843       | Fcgr3     | 1398246 a.t  | 86809011      | Down      | 2.0   | 0.0370  | 0.2071     |        |         |            |        |                  | Rattus norvegicus similar to Fc receptor, IgG, low affinity III                                                                                                   |                                                                                                                                      |
| 13         | AI231626        | Ras5      | 1393167 a.t  | 85445325      | Down      | 1.6   | 0.0342  | 0.2009     |        |         |            |        |                  | regulator of G-protein signaling 5                                                                                                                                |                                                                                                                                      |
| 13         | AA894335        | -         | 1375590 a.t  | 46545034      | Down      | 1.6   | 0.0048  | 0.0932     |        |         |            |        |                  | Rattus norvegicus similar to RIKEN cDNA 5730454B08 (LOC310649), mRNA                                                                                              |                                                                                                                                      |
| 13         | AI704885        | -         | 1381542 a.t  | 40948540      | Down      | 1.5   | 0.0062  | 0.0977     |        |         |            |        |                  | Rattus norvegicus similar to RIKEN cDNA 1300013G12 (LOC304766), mRNA                                                                                              |                                                                                                                                      |
| 13         | BF402061        | Capon     | 1398843 a.t  | 86360648      | Down      |       |         |            | 1.8    | 0.0132  | 0.0407     |        |                  | Rattus norvegicus transcribed sequences                                                                                                                           |                                                                                                                                      |
| 13         | AI717113        | FS        | 1374300 a.t  | 79992013      | Down      |       |         |            | 1.8    | 0.0237  | 0.0563     |        |                  | coagulation factor 5                                                                                                                                              |                                                                                                                                      |
| 13         | AI406858        | -         | 1390987 a.t  | 86139707      | Up        |       |         |            |        |         | 1.5        | 0.0142 | 0.0551           | Rattus norvegicus transcribed sequences                                                                                                                           |                                                                                                                                      |
| 13         | AI407002        | -         | 1373908 a.t  | 86360648      | Down      |       |         |            | 2.2    |         |            |        |                  | Rattus norvegicus transcribed sequences                                                                                                                           |                                                                                                                                      |
| 13         | BF288190        | Ptprc     | 1390789 a.t  | 51247016      | Down      |       |         |            | 1.9    | 0.0293  | 0.0742     |        |                  | protein tyrosine phosphatase, receptor type, C                                                                                                                    |                                                                                                                                      |
| 13         | AA803579        | -         | 1392794 a.t  | 86131914      | Down      |       |         |            | 1.8    | 0.0091  | 0.0493     |        |                  | Rattus norvegicus transcribed sequences                                                                                                                           |                                                                                                                                      |
| 13         | BF417626        | -         | 1393187 a.t  | 89545247      | Down      |       |         |            | 1.8    | 0.0416  | 0.0898     |        |                  | Rattus norvegicus transcribed sequences                                                                                                                           |                                                                                                                                      |
| 13         | AI339193        | -         | 1379387 a.t  | 58927898      | Down      |       |         |            | 1.7    | 0.0204  | 0.0609     |        |                  | Rattus norvegicus transcribed sequences                                                                                                                           |                                                                                                                                      |
| 13         | BF406841        | -         | 1377301 a.t  | 48378522      | Down      |       |         |            | 1.6    | 0.0032  | 0.0327     |        |                  | Rattus norvegicus transcribed sequences                                                                                                                           |                                                                                                                                      |
| 13         | BE108956        | -         | 1392489 a.t  | 86360648      | Down      |       |         |            | 1.6    | 0.0184  | 0.0622     |        |                  | Rattus norvegicus transcribed sequences                                                                                                                           |                                                                                                                                      |
| 13         | AA943075        | -         | 1382388 a.t  | 57588620      | Down      |       |         |            | 1.6    | 0.0028  | 0.0327     |        |                  | Rattus norvegicus transcribed sequences                                                                                                                           |                                                                                                                                      |
| 13         | BI275261        | -         | 1379497 a.t  | 237646        | Down      |       |         |            | 1.6    | 0.0003  | 0.0173     |        |                  | Rattus norvegicus transcribed sequences                                                                                                                           |                                                                                                                                      |
| 13         | BM390782        | -         | 1384972 a.t  | 57588620      | Down      |       |         |            | 1.6    | 0.0051  | 0.0392     |        |                  | Rattus norvegicus transcribed sequences                                                                                                                           |                                                                                                                                      |
| 13         | NM_031170       | Sae       | 1381763 a.t  | 89112728      | Down      |       |         |            | 1.5    |         |            |        |                  | serum amylid D-component                                                                                                                                          |                                                                                                                                      |
| 13         | AI012859        | Rnasase   | 1380425 a.t  | 68822011      | Down      |       |         |            | 1.5    | 0.0419  | 0.0888     |        |                  | ribonuclease L (2, E_colloplasmid-encoded symbiote-dependent)                                                                                                     |                                                                                                                                      |
| 13         | BC369581        | -         | 1371472 a.t  | 85484906      | Down      |       |         |            | 1.5    | 0.0031  | 0.0327     |        |                  | Rattus norvegicus transcribed sequences                                                                                                                           |                                                                                                                                      |
| 14         | AA826001        | -         | 13882181 a.t | 118862198     | Down      | 1.5   | 0.0014  | 0.0604     |        |         |            |        |                  | Rattus norvegicus transcribed sequence with weak similarity to protein sc008116 (R.norvegicus) WASL, RAT Neural Wiskott-Aldrich syndrome protein (N-WASP)         |                                                                                                                                      |
| 14         | BI290769        | -         | 1382063 a.t  | 81988783      | Down      | 1.6   | 0.0062  | 0.0977     |        |         |            |        |                  | Rattus norvegicus hypothetical LOC305452 (LOC305452), mRNA                                                                                                        |                                                                                                                                      |
| 14         | AA828254        | -         | 1383930 a.t  | 14995498      | Down      |       |         |            | 2.1    | 0.0176  | 0.0484     |        |                  | small inducible cytokine B subfamily (Cys-X-Cys motif), member 13 (B-cell chemokine/tractant); B-cell-homolog chemokine (knakin for Burkitts lymphoma re          |                                                                                                                                      |
| 14         | BI285076        | -         | 1377286 a.t  | 10049664      | Down      |       |         |            | 1.6    | 0.0054  | 0.0406     |        |                  | Rattus norvegicus transcribed sequences                                                                                                                           |                                                                                                                                      |
| 14         | BI285078        | -         | 1376870 a.t  | 83909631      | Up        |       |         |            | 1.6    | 0.0157  | 0.0575     |        |                  | Rattus norvegicus similar to transcription factor MAZR2 (LOC305471), mRNA                                                                                         |                                                                                                                                      |
| 14         | BI289418        | Cd38      | 1393025 a.t  | 72320479      | Down      |       |         |            | 1.7    | 0.0489  | 0.0966     |        |                  | CD38 antigen                                                                                                                                                      |                                                                                                                                      |
| 14         | AB001382        | Sept1     | 1387581 a.t  | 84423008      | Down      |       |         |            | 1.7    | 0.0428  | 0.0893     |        |                  | recruited phosphoinositid                                                                                                                                         |                                                                                                                                      |
| 14         | AA848699        | -         | 1384044 a.t  | 39959936      | Down      |       |         |            | 1.6    | 0.0163  | 0.0544     |        |                  | Rattus norvegicus similar to beta-galactosidase (LOC305305), mRNA                                                                                                 |                                                                                                                                      |
| 14         | BF523573        | -         | 1388061 a.t  | 110484799     | Down      |       |         |            | 1.6    | 0.0307  | 0.0760     |        |                  | Rattus norvegicus transcribed sequences                                                                                                                           |                                                                                                                                      |
| 14         | BE110655        | -         | 1388317 a.t  | 87224018      | Down      |       |         |            | 1.5    | 0.0431  | 0.0893     |        |                  | Rattus norvegicus transcribed sequences                                                                                                                           |                                                                                                                                      |
| 14         | BF391447        | -         | 1392162 a.t  | 56994709      | Down      | 1.7   | 0.0148  | 0.1530     |        |         |            |        |                  | Rattus norvegicus transcribed sequences                                                                                                                           |                                                                                                                                      |
| 15         | BM387164        | -         | 1378087 a.t  | 56803906      | Down      |       |         |            | 1.6    | 0.0243  | 0.0572     |        |                  | Rattus norvegicus transcribed sequences                                                                                                                           |                                                                                                                                      |
| 15         | AI111212        | Pdim2     | 1375367 a.t  | 90594108      | Up        |       |         |            | 1.7    | 0.0093  | 0.0493     |        |                  | Rattus norvegicus similar to PDZ and LIM domain 2 (LOC290354), mRNA                                                                                               |                                                                                                                                      |
| 15         | AI15544         | -         | 1383392 a.t  | 39495179      | Down      |       |         |            | 1.7    | 0.0466  | 0.0946     |        |                  | Rattus norvegicus transcribed sequences                                                                                                                           |                                                                                                                                      |
| 15         | AA824588        | -         | 1392725 a.t  | 108030444     | Up        |       |         |            | 1.7    | 0.0466  | 0.0946     |        |                  | Rattus norvegicus similar to cDNA sequence BC006662 (LOC290500), mRNA                                                                                             |                                                                                                                                      |
| 15         | NM_012770       | Gucy1b2   | 1387719 a.t  | 41819400      | Up        |       |         |            | 1.6    | 0.0284  | 0.0723     |        |                  | guanylate cyclase, soluble, beta 2                                                                                                                                |                                                                                                                                      |
| 15         | AA892699        | -         | 1392967 a.t  | 87382731      | Down      |       |         |            | 1.6    | 0.0187  | 0.0629     |        |                  | Rattus norvegicus transcribed sequences                                                                                                                           |                                                                                                                                      |
| 15         | NM_053907       | Dnase1l3  | 1368204 a.t  | 18900363      | Down      |       |         |            | 2.2    | 0.0058  | 0.0417     |        |                  | deoxyribonuclease Like 3                                                                                                                                          |                                                                                                                                      |
| 15         | BI378310        | -         | 1385099 a.t  | 87547816      | Down      |       |         |            | 1.8    | 0.0073  | 0.0448     |        |                  | similarity to protein ref NP_033844 (H.sapiens) sciiellin (Homo sapiens)                                                                                          |                                                                                                                                      |
| 15         | BI303023        | -         | 1383708 a.t  | 108785601     | Down      |       |         |            | 1.7    | 0.0031  | 0.0327     |        |                  | strong similarity to protein ref NP_000782.1 (H.sapiens) integrin, beta-like 1 (with EGF-like repeat domains) [Homo sapiens]                                      |                                                                                                                                      |
| 15         | AF314657        | Clu       | 1367784 a.t  | 45399691      | Down      |       |         |            | 1.6    | 0.0338  | 0.0802     |        |                  | clustarin                                                                                                                                                         |                                                                                                                                      |
| 15         | BE104961        | -         | 1379538 a.t  | 35487815      | Down      |       |         |            | 1.5    | 0.0365  | 0.0837     |        |                  | Rattus norvegicus similar to centromere protein J, centrosomal P4.1-associated protein, LYST-interacting protein LIP1, LAG-3-associated protein (LOC305908), mRNA |                                                                                                                                      |
| 15         | AI137275        | -         | 1375115 a.t  | 10333818      | Up        |       |         |            | 1.6    | 0.0256  | 0.1821     |        |                  | Rattus norvegicus similar to wingless apart-like CG3707-PA (LOC290577), mRNA                                                                                      |                                                                                                                                      |
| 16         | AF209114        | LOC192253 | 1388040 a.t  | 83812189      | Down      | 1.6   | 0.0256  | 0.1821     |        |         |            |        |                  | myosin heavy chain Myr 8                                                                                                                                          |                                                                                                                                      |
| 16         | LIJ2323         | Nrq1      | 1370667 a.t  | 63053630      | Down      | 1.5   | 0.0468  | 0.2103     |        |         |            |        |                  | neurexin 1                                                                                                                                                        |                                                                                                                                      |
| 16         | AI190253        | -         | 1379471 a.t  | 20463328      | Up        |       |         |            | 1.9    | 0.0266  | 0.0582     |        |                  | Rattus norvegicus similar to otupulin protein family member (XC177) (LOC296386), mRNA                                                                             |                                                                                                                                      |
| 16         | AI710682        | -         | 1371354 a.t  | 6639336       | Up        |       |         |            | 1.7    | 0.0028  | 0.0327     |        |                  | Rattus norvegicus similar to troponin C, cardiac muscle - mouse (LOC290961), mRNA                                                                                 |                                                                                                                                      |
| 16         | AI030212        | -         | 1383031 a.t  | 62307869      | Up        |       |         |            | 1.6    | 0.0096  | 0.0493     |        |                  | ---                                                                                                                                                               |                                                                                                                                      |
| 16         | AA892204        | -         | 1386382 a.t  | 5892391       | Up        |       |         |            | 1.5    | 0.0372  | 0.0846     |        |                  | Rattus norvegicus transcribed sequences                                                                                                                           |                                                                                                                                      |
| 16         | BE118080        | LOC207125 | 1371091 a.t  | 83402975      | Up        |       |         |            | 1.5    | 0.0178  | 0.0614     |        |                  | unknown protein                                                                                                                                                   |                                                                                                                                      |
| 16         | BI303853        | -         | 1381566 a.t  | 30959054      | Down      |       |         |            | 1.8    | 0.0416  | 0.0888     |        |                  | Rattus norvegicus transcribed sequences                                                                                                                           |                                                                                                                                      |
| 16         | NM_131328       | Cpe       | 1386921 a.t  | 52049664      | Down      |       |         |            | 1.9    | 0.0557  | 0.0831     |        |                  | carboxypeptidase E                                                                                                                                                |                                                                                                                                      |
| 16         | AI237688        | -         | 1382601 a.t  | 56307360      | Down      |       |         |            | 1.7    | 0.0050  | 0.0392     |        |                  | Rattus norvegicus transcribed sequences                                                                                                                           |                                                                                                                                      |
| 17         | BF388256        | -         | 1381316 a.t  | 41225418      | Up        | 1.9   | 0.0346  | 0.2016     |        |         |            |        |                  | Rattus norvegicus transcribed sequences                                                                                                                           |                                                                                                                                      |
| 17         | BF397269        | -         | 1388111 a.t  | 8748412       | Down      | 2.3   | 0.0380  | 0.2095     |        |         |            |        |                  | Rattus norvegicus LOC361197 (LOC361197), mRNA                                                                                                                     |                                                                                                                                      |
| 17         | BF553179        | -         | 1383759 a.t  | 11962085      | Down      | 2.1   | 0.0112  | 0.1393     |        |         |            |        |                  | Rattus norvegicus similar to nuclear ATP/GTP-binding protein (LOC290986), mRNA                                                                                    |                                                                                                                                      |
| 17         | AA979591        | -         | 1386180 a.t  | 47529887      | Down      | 1.7   | 0.0019  | 0.0604     |        |         |            |        |                  | Rattus norvegicus similar to leucine rich repeat containing 16 (LOC369841), mRNA                                                                                  |                                                                                                                                      |
| 17         | AA997590        | -         | 1385248 a.t  | 20881962      | Down      | 1.6   | 0.0487  | 0.2103     |        | 1.7     | 0.0495     | 0.0886 |                  |                                                                                                                                                                   | Rattus norvegicus transcribed sequence with moderate similarity to protein prc35272 (H.sapiens) B35272 osteoinductive factor - human |
| 17         | AV140475        | Cuob2     | 1388169 a.t  | 83023864      | Down      |       |         |            | 1.6    | 0.0148  | 0.0614     |        |                  | CUO-1 related RNA-binding protein 2                                                                                                                               |                                                                                                                                      |
| 17         | AI029126        | -         | 1379518 a.t  | 33137357      | Up        |       |         |            | 1.6    | 0.0009  | 0.0232     |        |                  | Rattus norvegicus transcribed sequences                                                                                                                           |                                                                                                                                      |
| 17         | AI007775        | -         | 1393348 a.t  | 36881748      | Up        |       |         |            | 1.6    | 0.0059  | 0.0419     |        |                  | Rattus norvegicus transcribed sequences                                                                                                                           |                                                                                                                                      |
| 17         | AA920109        | -         | 1393489 a.t  | 57290713      | Down      |       |         |            | 3.0    | 0.0183  | 0.0622     |        |                  | similarity to protein pdb 1LBG (E. coli) B Chain B, Lactose Operon Repressor Bound To 21-Base Pair Symmetric Operator Dna, Alpha Carbon Only                      |                                                                                                                                      |
| 17         | BI294018        | -         | 1392648 a.t  | 86361701      | Down      |       |         |            | 2.1    | 0.0449  | 0.0923     |        |                  | Rattus norvegicus similar to macrophage mannose receptor precursor (LOC2                                                                                          |                                                                                                                                      |

Table 1

| Chromosome | Gene Identifier | Gene ID  | Other ID | Position (Mb) | Direction | Ratio | Week4<br>p-value | adjp-value | Ratio  | Week12<br>p-value | adjp-value | Direction | Week20<br>p-value | adjp-value | Gene Description                                                                                                                                     |
|------------|-----------------|----------|----------|---------------|-----------|-------|------------------|------------|--------|-------------------|------------|-----------|-------------------|------------|------------------------------------------------------------------------------------------------------------------------------------------------------|
| 19         | BE108555        | ZD106    | 1386661  | 40365883      | Up        |       |                  |            |        |                   |            | 1.6       | 0.0123            | 0.0528     | Rattus norvegicus similar to Ddx19 protein (LOC292022). mRNA                                                                                         |
| 19         | BE108538        | -        | 1379079  | 40389933      | Up        |       |                  |            |        |                   |            | 1.6       | 0.0408            | 0.0886     | Rattus norvegicus transcribed sequences                                                                                                              |
| 19         | AI575458        | -        | 1383083  | 52213643      | Up        |       |                  |            |        |                   |            | 1.5       | 0.0105            | 0.0493     | Rattus norvegicus similar to SMART1 (LOC292064). mRNA                                                                                                |
| 19         | BI289813        | -        | 1372800  | at            | Up        |       |                  |            |        |                   |            | 1.5       | 0.0028            | 0.0327     | ---                                                                                                                                                  |
| 19         | AI071216        | -        | 1383973  | at            | Up        |       |                  |            |        |                   |            | 1.5       | 0.0215            | 0.0647     | Rattus norvegicus similar to hypothetical protein E330010G16 (LOC307816). mRNA                                                                       |
| 19         | BF414702        | -        | 1383641  | at            | Down      |       |                  |            |        |                   |            | 1.6       | 0.0420            | 0.0888     | endothelin receptor type A                                                                                                                           |
| 19         | BI275887        | -        | 1360733  | at            | Down      |       |                  |            |        |                   |            | 1.6       | 0.0431            | 0.0893     | Rattus norvegicus transcribed sequences                                                                                                              |
| 19         | BF448891        | -        | 1394145  | at            | Down      |       |                  |            |        |                   |            | 1.6       | 0.0062            | 0.0428     | endothelin receptor type A                                                                                                                           |
| 20         | AI012393        | Bmi7     | 1376373  | at            | Up        | 1.6   | 0.0446           | 0.2103     |        |                   |            |           |                   |            | similarity to protein sp-P14373 (H.sapiens) RFP_HUMAN Zinc-finger protein RFP (Ret finger protein) (Tripartite motif protein 27)                     |
| 20         | BE096729        | Fhd      | 1387877  | at            | Down      | 1.6   | 0.0040           | 0.0809     |        |                   |            |           |                   |            | forminotransferase cyclodeaminase                                                                                                                    |
| 20         | AI599350        | Phm59    | 1370188  | at            | Down      | 1.6   | 0.0048           | 0.0922     |        |                   |            |           |                   |            | proteasome (prosome, macropain) subunit, beta type 9                                                                                                 |
| 20         | AW252296        | Col18a1  | 1381431  | at            | Down      | 1.6   | 0.0000           | 0.0216     |        |                   |            |           |                   |            | Rattus norvegicus transcribed sequences                                                                                                              |
| 20         | BE108058        | Col18a1  | 1388394  | at            | Down      |       |                  |            |        |                   |            | 1.6       | 0.0260            | 0.0709     | Rattus norvegicus transcribed sequences                                                                                                              |
| 20         | AJ249375        | RT1.S9   | 1388213  | at            | Down      | 1.6   | 0.0489           | 0.2103     |        |                   |            |           |                   |            | RT1 class Ib RT1.S9                                                                                                                                  |
| 20         | AI548626        | -        | 1388128  | at            | Down      | 1.5   | 0.0176           | 0.1640     |        |                   |            |           |                   |            | Rattus norvegicus transcribed sequences                                                                                                              |
| 20         | BI290161        | -        | 1382041  | at            | Up        |       |                  |            |        |                   |            |           |                   |            | ---                                                                                                                                                  |
| 20         | AI113218        | Sagf1    | 1382963  | at            | Up        |       |                  |            |        |                   |            | 1.7       | 0.0019            | 0.0325     | Rattus norvegicus similar to 1-acylglycerol-3-phosphate-gamma (LOC294324). mRNA                                                                      |
| 20         | AF413572        | Pkb      | 1389105  | at            | Down      |       |                  |            |        |                   |            | 2.4       | 0.0091            | 0.0493     | serine/threonine-1-phosphatase lyase 1                                                                                                               |
| 20         | AI411352        | Gia1     | 1372002  | at            | Down      |       |                  |            |        |                   |            | 1.8       | 0.0299            | 0.0760     | protein kinase (GAMF-dependent, catalytic) inhibitor beta                                                                                            |
| 20         | AW326939        | -        | 1382736  | at            | Down      |       |                  |            |        |                   |            | 1.8       | 0.0136            | 0.0546     | gap junction membrane channel protein alpha 1                                                                                                        |
| 20         | BM383464        | -        | 1382437  | at            | Down      |       |                  |            |        |                   |            | 1.7       | 0.0124            | 0.0528     | RT1 class Ib gene(Aw2)                                                                                                                               |
| 20         | NM_019309       | Grik2    | 1369036  | at            | Down      |       |                  |            |        |                   |            | 1.5       | 0.0013            | 0.0282     | glutamate receptor, ionotropic, kainate 2                                                                                                            |
| X          | AI189241        | -        | 1372637  | at            | Up        | 1.9   | 0.0459           | 0.2103     |        |                   |            |           |                   |            | Rattus norvegicus transcribed sequence with weak similarity to protein pir138488 (H.sapiens) 138488 trophinin - human                                |
| X          | BG371620        | -        | 1383675  | at            | Up        | 1.5   | 0.0481           | 0.2103     |        |                   |            |           |                   |            | ---                                                                                                                                                  |
| X          | NM_053428       | Fgf13    | 1368114  | at            | Up        | 1.5   | 0.0351           | 0.2016     |        |                   |            |           |                   |            | fibroblast growth factor 13                                                                                                                          |
| X          | BF396777        | MGC94181 | 1395201  | at            | Up        | 1.5   | 0.0227           | 0.1748     |        |                   |            |           |                   |            | Rattus norvegicus transcribed sequences                                                                                                              |
| X          | AI170324        | -        | 1373862  | at            | Down      | 1.5   | 0.0057           | 0.0977     |        |                   |            |           |                   |            | similarity to protein sp-P97946 (M.musculus) VEGD_MOUSE Vascular endothelial growth factor D precursor (VEGF-D) (c-fos induced growth factor) (FIGF) |
| X          | NM_013197       | Aaa2     | 1367985  | at            | Down      |       |                  |            | 2.7    | 0.0201            | 0.0523     | 1.9       | 0.0341            | 0.0803     | aminolevulinic acid synthase 2                                                                                                                       |
| X          | NM_021870       | Bmp16    | 1387734  | at            | Up        |       |                  |            |        |                   |            | 1.9       | 0.0425            | 0.0893     | bone morphogenetic protein 15                                                                                                                        |
| X          | NM_012521       | Cals3    | 1369339  | at            | Up        |       |                  |            |        |                   |            | 1.8       | 0.0247            | 0.0794     | calpain 3                                                                                                                                            |
| X          | BF389476        | MGC94465 | 1380835  | at            | Up        |       |                  |            |        |                   |            | 1.6       | 0.0133            | 0.0546     | Rattus norvegicus similar to hypothetical protein FLJ12671 (LOC317205). mRNA                                                                         |
| X          | BG379491        | -        | 1374218  | at            | Up        |       |                  |            |        |                   |            | 1.8       | 0.0007            | 0.0216     | Rattus norvegicus transcribed sequences                                                                                                              |
| X          | BI274139        | -        | 1375276  | at            | Up        |       |                  |            |        |                   |            | 1.6       | 0.0019            | 0.0325     | Rattus norvegicus similar to mitochondrial inner membrane translocase component Tim17b (LOC317374). mRNA                                             |
| X          | NM_017251       | Gp1      | 1387145  | at            | Up        |       |                  |            |        |                   |            | 1.6       | 0.0050            | 0.0392     | gap junction membrane channel protein beta 1                                                                                                         |
| X          | BG373822        | -        | 1376706  | at            | Down      |       |                  |            |        |                   |            | 1.6       | 0.0486            | 0.0986     | Rattus norvegicus transcribed sequences                                                                                                              |
| X          | BF413976        | -        | 1389693  | at            | Down      |       |                  |            |        |                   |            | 1.6       | 0.0482            | 0.0982     | ---                                                                                                                                                  |
| UN         | BM388500        | -        | 1383977  | at            | Up        | 1.9   | 0.0252           | 0.1818     |        |                   |            |           |                   |            | ---                                                                                                                                                  |
| UN         | BF551160        | -        | 1394056  | at            | Down      | 1.7   | 0.0299           | 0.1884     |        |                   |            |           |                   |            | ---                                                                                                                                                  |
| UN         | LI15600         | Nr1d2    | 1370560  | at            | Up        |       |                  |            | 2.2    | 0.0086            | 0.0318     |           |                   |            | nuclear receptor subfamily 1, group D, member 2                                                                                                      |
| UN         | LI20796         | Nr1d2    | 1370541  | at            | Up        |       |                  |            | 1.7    | 0.0149            | 0.0432     |           |                   |            | nuclear receptor subfamily 1, group D, member 2                                                                                                      |
| UN         | BF284190        | Nr1d2    | 1390430  | at            | Up        |       |                  |            | 1.6    | 0.0380            | 0.0742     |           |                   |            | ---                                                                                                                                                  |
| UN         | AI237240        | -        | 1395238  | at            | Down      |       |                  |            |        |                   |            | 2.7       | 0.0253            | 0.0674     | ---                                                                                                                                                  |
| UN         | BE119819        | Rap2b    | 1392622  | at            | Down      |       |                  |            | 1.7    | 0.0259            | 0.0574     |           |                   |            | Rattus norvegicus transcribed sequences                                                                                                              |
| UN         | AF361355        | Pr1      | 1388103  | at            | Up        |       | 1.5              | 0.0048     | 0.0225 | 1.7               |            |           | 0.0026            | 0.0327     | voltage-dependent calcium channel gamma subunit-like protein                                                                                         |
| UN         | AF121791        | -        | 1384303  | at            | Up        |       |                  |            |        |                   |            | 1.7       | 0.0376            | 0.0846     | ---                                                                                                                                                  |
| UN         | AI717791        | -        | 1384302  | at            | Up        |       |                  |            |        |                   |            | 1.6       | 0.0400            | 0.0391     | ---                                                                                                                                                  |
| UN         | BF418508        | Ahp10    | 1389441  | at            | Down      |       |                  |            |        |                   |            | 1.5       | 0.0010            | 0.0238     | annexin V-binding protein ABP-10                                                                                                                     |

Table2

| Week | Total Networks | Top Networks | High Level Functions                          | Significance       | Top Function                                  | Significance       | Canonical Pathway (p<0.05)                      | Node                                     |
|------|----------------|--------------|-----------------------------------------------|--------------------|-----------------------------------------------|--------------------|-------------------------------------------------|------------------------------------------|
| 4    | 10             | 1            | Immune Response                               | 3.87E-8 - 2.88E-2  | Development Disorder                          | 3.46E-15 - 3.15E-5 | Wnt/B-catenin Signaling                         | Crebbp(2), Csnk1e(1), Sfrp2(3), Wnt2b(3) |
|      |                |              | Cell-to-Cell Signaling and Interaction        | 1.27E-6 - 2.88E-2  | Cellular Growth and Proliferation             | 2.09E-14 - 5.88E-5 | Amyloid Processing                              | Csnk1e(1), Psen(1)                       |
|      |                |              | Immune and Lymphatic Development and Function | 1.27E-6 - 2.88E-2  | Cell Death                                    | 1.87E-13 - 5.88E-5 | Antigen Presentation                            | HLA-E(1), Psmb9(1)                       |
|      |                |              |                                               |                    | Cellular Development                          | 8.90E-13 - 6.36E-5 |                                                 |                                          |
|      |                | 2            | Gene Expression                               | 1.15E-7 - 3.84E-3  |                                               |                    |                                                 |                                          |
|      |                |              | Viral Function                                | 6.30E-6 - 3.84E-3  |                                               |                    |                                                 |                                          |
|      |                |              | Cancer                                        | 1.43E-5 - 3.84E-3  |                                               |                    |                                                 |                                          |
|      |                | 3            | Cellular Development                          | 8.04E-8 - 3.84E-3  |                                               |                    |                                                 |                                          |
|      |                |              | Developmental Disorder                        | 2.64E-7 - 3.84E-3  |                                               |                    |                                                 |                                          |
|      |                |              | Cellular Growth and Proliferation             | 2.87E-7 - 3.84E-3  |                                               |                    |                                                 |                                          |
| 12   | 6              | 1            | Gene Expression                               | 2.68E-10 - 6.60E-5 | Gene Expression                               | 8.19E-13 - 1.04E-5 | Wnt/B-catenin Signaling                         | Tcf4(2), Tgfb3(1)                        |
|      |                |              | Cell-to-Cell Signaling and Interaction        | 9.15E-10 - 8.57E-5 | Cell-to-Cell Signaling and Interaction        | 2.71E-11 - 8.91E-6 | Glutathione Metabolism                          | Gstm1(2), Gstm2 (2)                      |
|      |                |              | Cellular Growth and Proliferation             | 9.15E-10 - 8.57E-5 | Cellular Growth and Proliferation             | 2.71E-11 - 1.25E-5 | Glycine, Serine, and Threonine Metabolism       | Alas2(1), Sars                           |
|      |                | 2            | Cardiovascular Disease                        | 5.17E-7 - 3.67E-3  | Connective Tissue Development and Function    | 2.71E-11 - 3.42E-6 |                                                 |                                          |
|      |                |              | Drug Metabolism                               | 5.17E-7 - 1.46E-3  |                                               |                    |                                                 |                                          |
|      |                |              | Hematological Disease                         | 5.17E-7 - 3.84E-3  |                                               |                    |                                                 |                                          |
|      |                |              | Small Molecule Biochemistry                   | 5.17E-7 - 3.84E-3  |                                               |                    |                                                 |                                          |
| 20   | 10             | 1            | Cell Morphology                               | 2.07E-7 - 3.84E-3  | Cellular Growth and Proliferation             | 3.40E-11 - 4.16E-5 | Nitric Oxide Signaling in Cardiovascular System | Gucy1a3(3), Gucy1b3(3)                   |
|      |                |              | Cell Cycle                                    | 1.03E-6 - 3.84E-3  | Connective Tissue Development and Function    | 7.21E-11 - 4.11E-5 |                                                 |                                          |
|      |                |              | Endocrine System Development and Function     | 1.03E-6 - 2.36E-3  | Cellular Movement                             | 8.58E-11 - 3.60E-5 |                                                 |                                          |
|      |                |              | Cellular Development                          | 2.18E-6 - 3.49E-3  | Immune and Lymphatic Development and Function | 1.49E-10 - 4.18E-5 |                                                 |                                          |
|      |                | 2            | Gene Expression                               | 1.99E-8 - 9.24E-4  |                                               |                    |                                                 |                                          |
|      |                |              | Cell Morphology                               | 5.20E-8 - 1.43E-5  |                                               |                    |                                                 |                                          |
|      |                |              | Cell-to-Cell Signaling and Interaction        | 2.07E-7 - 9.54E-4  |                                               |                    |                                                 |                                          |
|      |                | 3            | Cellular Movement                             | 1.31E-8 - 3.16E-3  |                                               |                    |                                                 |                                          |
|      |                |              | Cellular Development                          | 1.31E-7 - 3.84E-3  |                                               |                    |                                                 |                                          |
|      |                |              | Immune and Lymphatic Development and Function | 1.31E-7 - 3.84E-3  |                                               |                    |                                                 |                                          |

Table3

| Chromosome | Gene Identifier | Gene ID        | Other ID     | Position (Mb) | Gene Description                                                                                                                                                                                                                                     |
|------------|-----------------|----------------|--------------|---------------|------------------------------------------------------------------------------------------------------------------------------------------------------------------------------------------------------------------------------------------------------|
| 1          | NM_021663       | NUC52_RAT      | 1370000_at   | 174624096     | NEFA precursor                                                                                                                                                                                                                                       |
| 1          | I02827          | LOC8A_RAT      | 1370897_at   | 90337907      | branched chain keto acid dehydrogenase subunit E1, alpha polypeptide                                                                                                                                                                                 |
| 1          | A1169562        | Q8374_RAT      | 1371080_at   | 94412803      | kallikrein                                                                                                                                                                                                                                           |
| 1          | BF389640        | QOAG20_RAT     | 1373485_at   | 267369410     | Rattus norvegicus similar to eukaryotic translation initiation factor 3, subunit 10 (theta, 150/170kDa; eukaryotic translation initiation factor 3, subunit 10, 170kD); Eukaryotic translation initiation factor 3, subunit 10, 170kD; eukaryotic tr |
| 1          | BE099904        |                | 1381264_at   | 264689833     | Rattus norvegicus transcribed sequences                                                                                                                                                                                                              |
| 1          | AA020133        | XP_218291_3    | 1381118_x_at | 12076570136   | Rattus norvegicus similar to protein pb; ILBG (E. coli) B Chain B, Lactose Operon Repressor Bound To 21-Base Pair Symmetric Operator Dna, Alpha Carbons Only                                                                                         |
| 1          | AA956308        | XP_218291_3    | 1381118_x_at | 72699408      | Rattus norvegicus similar to RIKEN cDNA 2810439M05 (LOC208361), mRNA                                                                                                                                                                                 |
| 1          | BF39429         | XP_215000_3    | 1380226_at   | 149425862     | Rattus norvegicus similar to RIKEN cDNA 4933417L02 (LOC293117), mRNA                                                                                                                                                                                 |
| 1          | A023296         | Q2V057_RAT     | 1389845_at   | 85494812      | Rattus norvegicus similar to proline dehydrogenase (oxidase) 2 (LOC361538), mRNA                                                                                                                                                                     |
| 1          | AA064142        | XP_344925_2    | 1389889_at   | 1576372994    | Rattus norvegicus similar to RIKEN cDNA 2810209A20 (LOC368121), mRNA                                                                                                                                                                                 |
| 1          | AA121274        | C071_RAT       | 1390801_at   | 228097480     | Rattus norvegicus transcribed sequences                                                                                                                                                                                                              |
| 1          | AA145746        |                | 1392249_at   | 20355444      | Rattus norvegicus transcribed sequences                                                                                                                                                                                                              |
| 1          | AA893579        |                | 1392794_at   | 203379419     | Rattus norvegicus transcribed sequences                                                                                                                                                                                                              |
| 1          | AA819959        |                | 1392982_at   | 101810286     | Rattus norvegicus transcribed sequences                                                                                                                                                                                                              |
| 1          | BF285952        | NP_001034754.1 | 1393474_at   | 98197898      | Rattus norvegicus similar to cytosolic sulfotransferase (LOC292915), mRNA                                                                                                                                                                            |
| 1          | AA045155        | NP_001031363.1 | 1393929_at   | 47115584      | Rates norvegicus similar to G protein-coupled receptor KY411 (LOC308163), mRNA                                                                                                                                                                       |
| 1          | BF294064        |                | 1395544_at   | 103984540     | Rattus norvegicus similar to methylcrotonyl-Coenzyme A carboxylase 1 (alpha) (LOC294972), mRNA                                                                                                                                                       |
| 1          | BE097460        |                | 1398700_at   | 40889901      | Rattus norvegicus transcribed sequences                                                                                                                                                                                                              |
| 2          | NM_031620       | SERA_RAT       | 1367811_at   | 124600017     | 3-phosphoglycerate dehydrogenase                                                                                                                                                                                                                     |
| 2          | NM_017090       | GCYA3_RAT      | 1368154_at   | 173755007     | guanylate cyclase 1, soluble, alpha 3                                                                                                                                                                                                                |
| 2          | AF202115        | ICERU_RAT      | 1368419_at   | 10508278      | Juvenile hemin                                                                                                                                                                                                                                       |
| 2          | NM_012889       | VICAM1_RAT     | 1368474_at   | 212277654     | vascular cell adhesion molecule 1                                                                                                                                                                                                                    |
| 2          | AF367210        | IL7_RAT        | 1369208_at   | 96356083      | interleukin 7                                                                                                                                                                                                                                        |
| 2          | U78897          |                | 1369886_at   | 144267748     | activity and neurotransmitter-induced early gene protein 4 (ania-4)                                                                                                                                                                                  |
| 2          | BE411765        | CELRF2_RAT     | 1371018_at   | 203905254     | cadherin EGF LAG seven-pass C-type receptor 2                                                                                                                                                                                                        |
| 2          | BI281702        | MAP1B_RAT      | 1373263_at   | 30415255      | microtubule-associated protein 1b                                                                                                                                                                                                                    |
| 2          | AA176320        | XP_226988.3    | 1373416_at   | 113315728     | Rattus norvegicus transcribed sequences                                                                                                                                                                                                              |
| 2          | BE107853        |                | 1373497_at   | 142404903     | Rattus norvegicus transcribed sequences                                                                                                                                                                                                              |
| 2          | AA087384        |                | 1373778_at   | 47172864      | Rattus norvegicus transcribed sequences                                                                                                                                                                                                              |
| 2          | BF388224        |                | 1379175_at   | 234240301     | Rattus norvegicus transcribed sequences                                                                                                                                                                                                              |
| 2          | BG374101        |                | 1381262_at   | 181637899     | Rattus norvegicus transcribed sequences                                                                                                                                                                                                              |
| 2          | AA819288        |                | 1382274_at   | 157332263     | Rattus norvegicus similar to Retinoid acid receptor responder protein 1 (Tazarotene-induced gene 1 protein) (RAR-responsive protein TIG1) (LOC310486), mRNA                                                                                          |
| 2          | BM334664        |                | 1382437_at   | 208517037     | RIT class B gene/ha2                                                                                                                                                                                                                                 |
| 2          | AA511405        | XP_227217.3    | 1385407_at   | 155315259     | Rattus norvegicus similar to hypothetical protein FLJ22693 (LOC310467), mRNA                                                                                                                                                                         |
| 2          | A0237532        | XP_227203.2    | 1385872_at   | 162126352     | Rattus norvegicus transcribed sequences                                                                                                                                                                                                              |
| 2          | BF280410        | XP_226824.3    | 1386952_at   | 58105666      | Rattus norvegicus transcribed sequences                                                                                                                                                                                                              |
| 2          | BF294922        |                | 1388857_at   | 119296979     | Rattus norvegicus transcribed sequences                                                                                                                                                                                                              |
| 2          | BI282008        |                | 1389003_at   | 2911603       | Rattus norvegicus transcribed sequences                                                                                                                                                                                                              |
| 2          | BF402235        |                | 1392262_at   | 204000799     | Rattus norvegicus transcribed sequences                                                                                                                                                                                                              |
| 2          | BF409007        |                | 1393563_at   | 116159619     | Rattus norvegicus transcribed sequences                                                                                                                                                                                                              |
| 2          | BF411556        |                | 1394363_at   | 224263853     | Rattus norvegicus transcribed sequences                                                                                                                                                                                                              |
| 2          | BF553729        | QOQXK5_RAT     | 1397820_at   | 200218630     | Rattus norvegicus transcribed sequences                                                                                                                                                                                                              |
| 3          | NM_032066       | NP_114455.1    | 1398051_at   | 79436634      | smooth muscle-specific 17 beta-hydroxysteroid dehydrogenase type 3                                                                                                                                                                                   |
| 3          | NM_053498       | ENP8_RAT       | 1398315_at   | 141384540     | ectonucleoside triphosphate diphosphotriphosphate 6                                                                                                                                                                                                  |
| 3          | BM369019        | NP_114013.1    | 1398829_at   | 112608480     | fibrin-1                                                                                                                                                                                                                                             |
| 3          | BI295949        | NP_001011965.1 | 1373590_at   | 14393734      | Rattus norvegicus transcribed sequences                                                                                                                                                                                                              |
| 3          | BF284124        | XP_230325.3    | 1377018_at   | 87795505      | Rattus norvegicus similar to E43000205Rik protein (LOC311252), mRNA                                                                                                                                                                                  |
| 3          | AA273762        | XP_216007.3    | 1379394_at   | 4180013       | Rattus norvegicus similar to G333139-PA (LOC296580), mRNA                                                                                                                                                                                            |
| 3          | BI294934        |                | 1380612_at   | 169762453     | Rattus norvegicus transcribed sequences                                                                                                                                                                                                              |
| 3          | AA527286        |                | 1380899_at   | 143411116     | Rattus norvegicus similar to Protein C20orf160 (LOC311550), mRNA                                                                                                                                                                                     |
| 3          | BF553538        | CXA9_RAT       | 1386123_at   | 99861095      | Rattus norvegicus transcribed sequences                                                                                                                                                                                                              |
| 3          | BF563766        |                | 1386995_at   | 4206895       | Rattus norvegicus transcribed sequences                                                                                                                                                                                                              |
| 4          | AA011345        | WNK1_RAT       | 1398140_at   | 156297841     | protein kinase, vaine deficient 1                                                                                                                                                                                                                    |
| 4          | NM_013080       | PTPRZ_RAT      | 1388350_at   | 49334202      | protein tyrosine phosphatase, receptor-type, Z polypeptide 1                                                                                                                                                                                         |
| 4          | BI291846        |                | 1371969_at   | 52062872      | caldesmon 1                                                                                                                                                                                                                                          |
| 4          | BF537890        | MET_RAT        | 1374665_at   | 43154101      | Rattus norvegicus transcribed sequences                                                                                                                                                                                                              |
| 4          | AA012630        | PTGD2_RAT      | 1377012_at   | 94611607      | Rattus norvegicus transcribed sequences                                                                                                                                                                                                              |
| 4          | AA529483        | NP_997677.1    | 1378365_at   | 117432385     | Rattus norvegicus transcribed sequences                                                                                                                                                                                                              |
| 4          | BF389527        |                | 1381723_at   | 152898769     | ---                                                                                                                                                                                                                                                  |
| 4          | BF289769        | NP_001034433.1 | 1383401_at   | 42700914      | Rattus norvegicus transcribed sequences                                                                                                                                                                                                              |
| 4          | BE116205        | XP_242556.3    | 1384795_at   | 118125137     | Rattus norvegicus similar to nuclear protein, NP220 (LOC312491), mRNA                                                                                                                                                                                |
| 4          | AA524822        |                | 1390965_at   | 49659289      | Rattus norvegicus transcribed sequence with moderate similarity to protein ref:NP_036191.1 (M.musculus) Ca2+-dependent activator protein for secretion; Ca2+-dependent activator protein for secretion [Mus musculus]                                |
| 4          | AA639113        |                | 1392553_at   | 88666142      | Rattus norvegicus transcribed sequence with moderate similarity to protein pir:AS7384 (H.sapiens) A57384 multimerin, endothelial cell, precursor - human                                                                                             |
| 4          | BF283618        |                | 1392610_at   | 62792942      | Rattus norvegicus similar to hypothetical protein B290314D19 (LOC626236), mRNA                                                                                                                                                                       |
| 4          | BF400819        |                | 1396602_at   | 5272676       | Rattus norvegicus transcribed sequences                                                                                                                                                                                                              |
| 5          | NM_053977       | CAD17_RAT      | 1369224_at   | 26047160      | cadherin 17                                                                                                                                                                                                                                          |
| 5          | NM_021653       | ID01_RAT       | 1369259_at   | 123835247     | iodotransin, iodothyronine, type I                                                                                                                                                                                                                   |
| 5          | BF283766        | NP_852143.1    | 1373023_at   | 2286373       | Rattus norvegicus transcribed sequences                                                                                                                                                                                                              |
| 5          | BF284337        |                | 1373063_at   | 79494958      | Rattus norvegicus similar to RIKEN cDNA 2810435D12 (LOC298097), mRNA                                                                                                                                                                                 |
| 5          | BE109524        |                | 1390487_at   | 61961151      | Rattus norvegicus transcribed sequences                                                                                                                                                                                                              |
| 5          | BM394214        | NP_001069980.1 | 1138059_at   | 144905644     | Rattus norvegicus similar to Matrin 1, cartilage matrin protein 1 (LOC297894), mRNA                                                                                                                                                                  |
| 5          | AA028979        | QSBK25_RAT     | 1383395_at   | 160648328     | Rattus norvegicus similar to Argmatinase, mitochondrial precursor (Argmatine urechydrosase) (AUH) (LOC298607), mRNA                                                                                                                                  |
| 5          | AA547423        | BSND_RAT       | 1393209_at   | 127542219     | bartin                                                                                                                                                                                                                                               |
| 5          | BF401989        |                | 1396254_at   | 5249162       | Rattus norvegicus transcribed sequences                                                                                                                                                                                                              |
| 5          | GC378899        |                | 1399992_at   | 148615030     | Rattus norvegicus similar to hypothetical protein FL110315 (LOC362608), mRNA                                                                                                                                                                         |
| 6          | BG378238        |                | 1372524_at   | 40251362      | Rattus norvegicus similar to Kiaa0575 (LOC313977), mRNA                                                                                                                                                                                              |
| 6          | BE107255        | XP_234275.3    | 1374480_at   | 94024421      | Rattus norvegicus similar to hypothetical protein E130308H01 (LOC314212), mRNA                                                                                                                                                                       |
| 6          | BG667451        |                | 1377185_at   | 101599793     | Rattus norvegicus transcribed sequences                                                                                                                                                                                                              |
| 6          | AA103284        | XP_216791.3    | 1381376_at   | 136186929     | Rattus norvegicus similar to Trifid2 protein (LOC299340), mRNA                                                                                                                                                                                       |
| 6          | BM391545        |                | 1392733_at   | 77959323      | Rattus norvegicus transcribed sequences                                                                                                                                                                                                              |
| 6          | BM384008        | XP_216688.3    | 1392864_at   | 72685228      | Rattus norvegicus similar to p190-B (LOC299012), mRNA                                                                                                                                                                                                |
| 6          | AA819288        |                | 1371776_at   | 53801895      | phosphatidylinositol 3-kinase, regulatory subunit, polypeptide 1                                                                                                                                                                                     |
| 7          | BF351206        | QOQY87_RAT     | 1176542_at   | 1376542       | nuclear factor I2                                                                                                                                                                                                                                    |
| 7          | BI298372        |                | 1375467_at   | 140961650     | Rattus norvegicus similar to orly1 TD-element binding protein 7 (LOC366994), mRNA                                                                                                                                                                    |
| 7          | BM384525        | XP_218859.1    | 1395045_at   | 16321201      | Rattus norvegicus similar to NADH oxidoreductase (LOC299643), mRNA                                                                                                                                                                                   |
| 8          | NM_052963       | MMP12_RAT      | 1398530_at   | 4249938       | matrix metalloproteinase 12                                                                                                                                                                                                                          |
| 8          | BI291272        |                | 1373712_at   | 6644972       | Rattus norvegicus transcribed sequences                                                                                                                                                                                                              |
| 8          | BF405592        |                | 1377531_at   | 32289929      | Rattus norvegicus transcribed sequences                                                                                                                                                                                                              |
| 8          | AA997421        | XP_343612.2    | 1379721_at   | 21058321      | Rattus norvegicus similar to 2310047B19Rik protein (LOC363029), mRNA                                                                                                                                                                                 |
| 8          | BF542912        | SCN5B_RAT      | 1383435_at   | 42321453      | Rattus norvegicus similar to sodium ion channel protein, type I, form 1 (LOC367298), mRNA                                                                                                                                                            |
| 8          | NM_139422       | NP_569108.1    | 1387305_at   | 2039306       | caspase 12                                                                                                                                                                                                                                           |
| 8          | NM_021866       | CCR2_RAT       | 1387742_at   | 128892784     | chemokine receptor CCR2 gene                                                                                                                                                                                                                         |
| 8          | AA893518        | UP3_RAT        | 1389270_x_at | 36892614      | Rattus norvegicus similar to Urinary protein 3 precursor (RUP-3) (LOC300504), mRNA                                                                                                                                                                   |
| 8          | AA896918        | QR9R2_RAT      | 1390710_x_at | 44869380      | Rattus norvegicus similar to gp250 precursor (LOC300652), mRNA                                                                                                                                                                                       |
| 8          | BF408557        |                | 1391021_at   | 76091646      | Rattus norvegicus similar to KIAA1749 protein (LOC315756), mRNA                                                                                                                                                                                      |
| 9          | BI275716        | CODA1_RAT      | 1370959_at   | 44281582      | collagen, type III, alpha 1                                                                                                                                                                                                                          |
| 9          | AA527151        |                | 1374635_at   | 62252515      | Rattus norvegicus transcribed sequence with strong similarity to protein ref:NP_003003.1 (H.sapiens), a disintegrin and metalloproteinase domain 23 preproprotein [Homo sapiens]                                                                     |
| 9          | AA385237        |                | 1378346_at   | 110452096     | Rattus norvegicus transcribed sequences                                                                                                                                                                                                              |
| 9          | AA639159        | XP_340662.2    | 1386454_at   | 74409235      | Rattus norvegicus similar to YSP-1 form 1 (LOC367298), mRNA                                                                                                                                                                                          |
| 9          | BM384831        |                | 1393653_at   | 83412793      | Rattus norvegicus transcribed sequences                                                                                                                                                                                                              |
| 9          | BF523991        |                | 1396268_at   | 8425233       | Rattus norvegicus similar to putative nuclear protein (LOC301570), mRNA                                                                                                                                                                              |
| 9          | BE094410        |                | 1396170_at   | 73814131      | Rattus norvegicus transcribed sequences                                                                                                                                                                                                              |
| 9          | AA08959         |                | 1396942_at   | 13460537      | Rattus norvegicus hypothetical LOC301287 (LOC301287), mRNA                                                                                                                                                                                           |
| 10         | AA10414         |                | 1371545_at   | 96056298      | Rattus norvegicus transcribed sequences                                                                                                                                                                                                              |
| 10         | BI285135        | HCPI1_RAT      | 1374073_at   | 64576051      | Rattus norvegicus similar to DNA segment, Chr 11, ERATO Doi 18, expressed (LOC303333), mRNA                                                                                                                                                          |
| 10         | BE114669        | XP_340743.2    | 1374208_at   | 4372981       | Rattus norvegicus similar to RIKEN cDNA AA30104C18 (LOC364668), mRNA                                                                                                                                                                                 |

Table3

|    |           |                |              |            |                                                                                                                                                                                                                                        |
|----|-----------|----------------|--------------|------------|----------------------------------------------------------------------------------------------------------------------------------------------------------------------------------------------------------------------------------------|
| 10 | B1298463  |                | 1374356_at   | 15207723   | Rattus norvegicus similar to tripartite motif protein 32 (LOC302999), mRNA                                                                                                                                                             |
| 10 | BC390279  |                | 1375672_at   | 62782723   | Rattus norvegicus transcribed sequence with weak similarity to protein pR:RGECDW (E. coli) RGECDW transcription activator of D-serine dehydratase - Escherichia coli                                                                   |
| 10 | B1294949  | NP_001008361.1 | 1375674_at   | 10911559   | Rattus norvegicus similar to chromosome 16 open reading frame 5 (LOC360480), mRNA                                                                                                                                                      |
| 10 | BE100978  |                | 1379644_at   | 40248088   | Rattus norvegicus transcribed sequences                                                                                                                                                                                                |
| 10 | AW528010  |                | 1381233_at   | 97298015   | Rattus norvegicus transcribed sequences                                                                                                                                                                                                |
| 10 | BF408881  | XP_340881.2    | 1382957_at   | 82931188   | Rattus norvegicus similar to cisplatin resistance-associated overexpressed protein (LOC360602), mRNA                                                                                                                                   |
| 10 | BE112523  |                | 1383454_a_at | 1110674434 | Rattus norvegicus transcribed sequence with moderate similarity to protein ref:NP_071441.1 (H.sapiens) fructosamine-3-kinase [Homo sapiens]                                                                                            |
| 10 | AI180413  | APOH_RAT       | 1389350_at   | 97725096   | Rattus norvegicus similar to beta-2-glycoprotein I (LOC287774), mRNA                                                                                                                                                                   |
| 10 | BF419586  |                | 1389982_at   | 72806191   | LIM homeobox protein 1                                                                                                                                                                                                                 |
| 10 | BC532455  |                | 1390117_at   | 78207038   | Rattus norvegicus transcribed sequences                                                                                                                                                                                                |
| 10 | BC671264  |                | 1390793_at   | 99474536   | Rattus norvegicus similar to ATP-binding cassette transporter sub-family A member 8a (LOC303638), mRNA                                                                                                                                 |
| 10 | AI703949  |                | 1397956_at   | 15129199   | ---                                                                                                                                                                                                                                    |
| 11 | NM_133428 | NP_596919.1    | 1398583_a_at | 80230659   | histidine-rich glycoprotein                                                                                                                                                                                                            |
| 11 | BF283405  |                | 1397979_at   | 28558401   | Rattus norvegicus transcribed sequence with moderate similarity to protein sp:P00722 (E. coli) BGAL_ECOLI Beta-galactosidase (Lactase)                                                                                                 |
| 11 | AI909448  |                | 1398049_at   | 89871055   | Rattus norvegicus transcribed sequences                                                                                                                                                                                                |
| 11 | AI137518  | CXAR_RAT       | 1384816_at   | 17193505   | Rattus norvegicus transcribed sequences                                                                                                                                                                                                |
| 11 | AA891032  | XP_341011.2    | 1388503_at   | 84811466   | ---                                                                                                                                                                                                                                    |
| 11 | BC692292  |                | 1388879_at   | 44854446   | ---                                                                                                                                                                                                                                    |
| 11 | BI303277  |                | 1392025_x_at | 23905377   | Rattus norvegicus similar to 5033411B22Rik protein (LOC363767), mRNA                                                                                                                                                                   |
| 12 | NM_053626 | OXDA_RAT       | 1369491_at   | 43628160   | D-amino acid oxidase                                                                                                                                                                                                                   |
| 12 | AI103040  |                | 1376840_at   | 9688106    | Rattus norvegicus transcribed sequences                                                                                                                                                                                                |
| 12 | BF553979  | QFOI4_RAT      | 1383446_at   | 36233484   | Rattus norvegicus transcribed sequences                                                                                                                                                                                                |
| 12 | BF283000  | XP_347254.1    | 1390983_at   | 22777345   | Rattus norvegicus similar to Williams-Beuren syndrome critical region protein 21 (LOC368083), mRNA                                                                                                                                     |
| 13 | BE099979  | XP_213921.3    | 1375428_at   | 81491327   | Rattus norvegicus similar to cellular repressor of E1A-stimulated genes CREG (LOC289185), mRNA                                                                                                                                         |
| 13 | BF406641  |                | 1377301_at   | 48379022   | Rattus norvegicus transcribed sequences                                                                                                                                                                                                |
| 13 | BF380956  |                | 1377807_a_at | 81083440   | Rattus norvegicus transcribed sequence with strong similarity to protein sp:P00722 (E. coli) BGAL_ECOLI Beta-galactosidase (Lactase)                                                                                                   |
| 13 | AI704885  | NP_001012025.1 | 1381542_at   | 40948540   | Rattus norvegicus similar to RIKEN cDNA 1300013G12 (LOC304766), mRNA                                                                                                                                                                   |
| 13 | BF542890  |                | 1394400_at   | 96950732   | Rattus norvegicus transcribed sequences                                                                                                                                                                                                |
| 14 | A2325294  | XP_223611.1    | 1376161_at   | 86999069   | Rattus norvegicus similar to RIKEN cDNA 1110014L17 (LOC305502), mRNA                                                                                                                                                                   |
| 14 | BI291600  |                | 1377262_at   | 110170474  | Rattus norvegicus similar to KIAA2010 protein (LOC309993), mRNA                                                                                                                                                                        |
| 14 | BI299600  |                | 1378313_at   | 18662686   | Rattus norvegicus transcribed sequence with weak similarity to protein sp:O08816 (R.norvegicus) WASL_RAT Neural Wiskott-Aldrich syndrome protein (N-WASP)                                                                              |
| 14 | BF401106  | FURB_RAT       | 1383753_at   | 110139395  | Rattus norvegicus transcribed sequences                                                                                                                                                                                                |
| 14 | AI012358  |                | 1391303_at   | 87231825   | Rattus norvegicus transcribed sequence with strong similarity to protein ref:NP_150093.1 (H.sapiens) purine-rich element binding protein B [Homo sapiens]                                                                              |
| 15 | NM_052907 | DNSL3_RAT      | 1388294_at   | 10890283   | lecithinase 1-like 3                                                                                                                                                                                                                   |
| 15 | BI303923  | ITGB1          | 1383708_at   | 108785601  | Rattus norvegicus transcribed sequence with strong similarity to protein ref:NP_004782.1 (H.sapiens) integrin, beta-like 1 (with EGF-like repeat domains) [Homo sapiens]                                                               |
| 15 | A058292   | XP_224283.1    | 1384415_at   | 43208046   | Rattus norvegicus transcribed sequences                                                                                                                                                                                                |
| 15 | BC378310  |                | 1386509_at   | 87547816   | Rattus norvegicus transcribed sequence with strong similarity to protein ref:NP_003834.1 (H.sapiens) scellin [Homo sapiens]                                                                                                            |
| 15 | AI861175  | NP_001012040.1 | 1389332_at   | 2868684    | Rattus norvegicus similar to RIKEN cDNA 1700010P07 (LOC305884), mRNA                                                                                                                                                                   |
| 16 | BF283341  | TKT_RAT        | 1376635_at   | 5908757    | transketolase                                                                                                                                                                                                                          |
| 16 | BE114427  |                | 1377333_at   | 3758163    | Rattus norvegicus transcribed sequences                                                                                                                                                                                                |
| 16 | AI180253  |                | 1379411_at   | 20483828   | ---                                                                                                                                                                                                                                    |
| 16 | AI17260   | ARY1_RAT       | 1367187_a_at | 23845894   | N-acetyltransferase 1 (arylamine N-acetyltransferase)                                                                                                                                                                                  |
| 17 | AI029126  |                | 1379518_at   | 33137857   | Rattus norvegicus transcribed sequences                                                                                                                                                                                                |
| 17 | AA926109  |                | 1383486_at   | 57240213   | Rattus norvegicus transcribed sequence with moderate similarity to protein pdb:1LBG (E. coli) B Chain B, Lactose Operon Repressor Bound To 21-Base Pair Symmetric Operator Dna, Alpha Carbons Only                                     |
| 17 | BF560932  |                | 1384000_at   | 42175820   | Rattus norvegicus similar to sox-4 protein - mouse (LOC364712), mRNA                                                                                                                                                                   |
| 18 | NM_030858 | SMAD7_RAT      | 1368896_at   | 72204803   | MAD homolog 7 (Drosophila)                                                                                                                                                                                                             |
| 18 | BM391907  |                | 1373692_at   | 29303561   | Rattus norvegicus transcribed sequence with moderate similarity to protein ref:NP_003723.1 (H.sapiens) eukaryotic translation initiation factor 4E binding protein 3; eukaryotic initiation factor 4E-binding protein 3 [Homo sapiens] |
| 18 | BI281497  | GRAM3_RAT      | 1384177_at   | 52202307   | Rattus norvegicus similar to RIKEN cDNA 9130427A09 (LOC307288), mRNA                                                                                                                                                                   |
| 18 | A231438   | NP_001007688.1 | 1390569_at   | 81160881   | Rattus norvegicus transcribed sequences                                                                                                                                                                                                |
| 18 | AW920883  |                | 1394907_at   | 56545579   | Rattus norvegicus transcribed sequences                                                                                                                                                                                                |
| 19 | L07316    | MDP1_RAT       | 1388281_at   | 53503490   | dipeptidase 1                                                                                                                                                                                                                          |
| 19 | AY081218  | NP_612513.1    | 1370336_at   | 49882142   | pregnanancy-induced growth inhibitor                                                                                                                                                                                                   |
| 19 | AIWS3228  | IQOIQ3_RAT     | 1374167_at   | 35719490   | Rattus norvegicus hypothetical LOC291982 (LOC291982), mRNA                                                                                                                                                                             |
| 19 | BF548891  | EDNRA_RAT      | 1393415_at   | 32048233   | endothelin receptor type A                                                                                                                                                                                                             |
| 19 | BE108555  |                | 1396661_at   | 40906383   | Rattus norvegicus similar to Ddx19 protein (LOC292022), mRNA                                                                                                                                                                           |
| 19 | AF413572  | IPKB_RAT       | 1369105_a_at | 36655515   | protein kinase (cAMP dependent, catalytic) inhibitor beta                                                                                                                                                                              |
| 20 | AB047324  | NP_620186.1    | 1370545_at   | 44211846   | solute carrier family 16, member 10                                                                                                                                                                                                    |
| 20 | BM383785  |                | 1376432_at   | 8450329    | Rattus norvegicus similar to Tex27 protein (LOC361816), mRNA                                                                                                                                                                           |
| 20 | BI290161  | XP_215367.2    | 1382041_at   | 10731287   | Rattus norvegicus similar to 1-acvlqlvorol-3-phosphate-gamma (LOC294324), mRNA                                                                                                                                                         |
| 20 | BI289995  | VPS26_RAT      | 1382999_at   | 29709095   | Rattus norvegicus similar to vacuolar protein sorting 26; vacuole protein sorting 26; beta 58 (LOC361846), mRNA                                                                                                                        |
| 20 | BE090729  | ITCD_RAT       | 1387877_at   | 12470290   | formin/nucleation factor cytoskeletonase                                                                                                                                                                                               |
| 20 | AA901176  | XP_215372.3    | 1398511_at   | 13435983   | Rattus norvegicus similar to Sushi domain (SCR repeat) containing (LOC294335), mRNA                                                                                                                                                    |
| X  | AI170324  | VEGFD_RAT      | 1373882_at   | 50829626   | Rattus norvegicus transcribed sequence with moderate similarity to protein sp:P97946 (M.musculus) VEGD_MOUSE Vascular endothelial growth factor D precursor (VEGF-D) (c-fos induced growth factor) (FIGF)                              |
| UN | AIWS35280 |                | 1370986_s_at | ---        | Rattus norvegicus retroviral-like c-Ha-ras proto-oncogene mRNA, partial sequence                                                                                                                                                       |
| UN | AI716098  |                | 1376132_at   | ---        | Rattus norvegicus transcribed sequences                                                                                                                                                                                                |
| UN | AI145015  |                | 1381418_at   | ---        | Rattus norvegicus transcribed sequences                                                                                                                                                                                                |
| UN | BE096005  |                | 1383665_at   | ---        | ---                                                                                                                                                                                                                                    |
| UN | AI169075  |                | 1388526_at   | ---        | ---                                                                                                                                                                                                                                    |
| UN | BF416508  |                | 1389441_at   | ---        | annexin V-binding protein ABP-10                                                                                                                                                                                                       |
| UN | BM383122  |                | 1389500_at   | ---        | ---                                                                                                                                                                                                                                    |
| UN | BI289762  |                | 1390174_at   | ---        | ---                                                                                                                                                                                                                                    |
| UN | A232305   |                | 1392001_at   | ---        | ---                                                                                                                                                                                                                                    |
| UN | AW915435  |                | 1392554_a_at | ---        | Rattus norvegicus transcribed sequence with moderate similarity to protein ref:NP_036135.1 (M.musculus) cofactor required for Sp1 transcriptional activation subunit 2 (150 kDa) [Mus musculus]                                        |
| UN | AI008432  |                | 1392843_at   | ---        | Rattus norvegicus transcribed sequences                                                                                                                                                                                                |
| UN | AA943800  |                | 1394127_at   | ---        | Rattus norvegicus transcribed sequences                                                                                                                                                                                                |
| UN | AI239935  |                | 1394526_at   | ---        | Rattus norvegicus transcribed sequences                                                                                                                                                                                                |
| UN | A232740   |                | 1395238_at   | ---        | ---                                                                                                                                                                                                                                    |
| UN | BE116471  |                | 1395994_at   | ---        | Rattus norvegicus transcribed sequences                                                                                                                                                                                                |
| UN | BF298545  |                | 1396127_at   | ---        | ---                                                                                                                                                                                                                                    |
| UN | BI281813  |                | 1397744_at   | ---        | Rattus norvegicus transcribed sequences                                                                                                                                                                                                |

Table4

| Number | Gene Identifier    | Gene ID              | Position (Mb)    | Gene Description                                                                                                                       |
|--------|--------------------|----------------------|------------------|----------------------------------------------------------------------------------------------------------------------------------------|
| 1      | XM_579199.1        | Fga                  | 174737640        | 174753599 fibrinogen, alpha polypeptide                                                                                                |
| 2      | NM_020071.1        | Fgb                  | 174768160        | 174775103 fibrinogen, B beta polypeptide                                                                                               |
| 3      | NM_021757.2        | Plrg1                | 174780415        | 174796746 pleiotropic regulator 1 homolog (Arabidopsis)                                                                                |
| 4      | XM_227313.3        | LOC310550            | 174836071        | 175056529 similar to protocadherin 16 precursor; protocadherin 16; fibroblast cadherin FIB1; fibroblast cadherin 1; dachous homologue  |
| 5      | <b>XM_227314.3</b> | <b>Sfrp2</b>         | <b>175479310</b> | <b>175486882 secreted frizzled-related protein 2</b>                                                                                   |
| 6      | NM_198769.2        | Tlr2                 | 175613992        | 175613992 toll-like receptor 2                                                                                                         |
| 7      | XM_579995.1        | LOC499646            | 175800216        | 175801906 LOC499646                                                                                                                    |
| 8      | XM_215595.3        | RGD1309007_predicted | 175841812        | 175906450 similar to RIKEN cDNA 2610034E18 gene (predicted)                                                                            |
| 9      | XM_342268.2        | Trim2_predicted      | 175913283        | 175987825 tripartite motif protein 2 (predicted)                                                                                       |
| 10     | XM_215594.3        | RGD1311955_predicted | 176220891        | 176253825 similar to CG32384-PA (predicted)                                                                                            |
| 11     | NM_021763.1        | LOC60382             | 176275425        | 176353675 arfaptin 1                                                                                                                   |
| 12     | XM_227318.2        | Tigd4_predicted      | 176369448        | 176371430 tigger transposable element derived 4 (predicted)                                                                            |
| 13     | XM_579996.1        | LOC499647            | 176437962        | 176444681 LOC499647                                                                                                                    |
| 14     | XM_342269.2        | LOC361972            | 176445662        | 176485867 similar to RIKEN cDNA 9930117H01 gene                                                                                        |
| 15     | XM_579140.1        | Dear                 | 176736639        | 176739891 dual endothelin 1, angiotensin II receptor                                                                                   |
| 16     | XM_574968.1        | LOC361973            | 177242730        | 177243851 LOC361973                                                                                                                    |
| 17     | XM_342270.2        | Pet112l_predicted    | 177408100        | 177433793 PET112-like (yeast) (predicted)                                                                                              |
| 18     | XM_345227.2        | LOC365834            | 177632475        | 177669341 similar to KIAA1759 protein                                                                                                  |
| 19     | XM_227324.3        | LOC295167            | 177769873        | 177774358 similar to S-ANTIGEN PROTEIN PRECURSOR                                                                                       |
| 20     | XM_215597.3        | RGD1304885_predicted | 177970585        | 178081504 similar to SH3 domain protein D19 (predicted)                                                                                |
| 21     | NM_017153.1        | Rps3a                | 178092351        | 178096720 ribosomal protein S3a                                                                                                        |
| 22     | XM_342271.2        | Lrba_predicted       | 178267690        | 178787634 LPS-responsive beige-like anchor (predicted)                                                                                 |
| 23     | XM_579311.1        | RGD1308384_predicted | 178793765        | 178923600 similar to RIKEN cDNA 6330415M09 (predicted)                                                                                 |
| 24     | NM_017079.1        | Cd1d1                | 179011165        | 179014672 CD1d1 antigen                                                                                                                |
| 25     | XM_574969.1        | LOC499649            | 179088285        | 179089078 similar to high mobility group protein                                                                                       |
| 26     | NM_207606.1        | Neph1                | 179114757        | 179169185 nephrin 1                                                                                                                    |
| 27     | XM_227485.3        | Msr2_predicted       | 179278607        | 179293565 macrophage scavenger receptor 2 (predicted)                                                                                  |
| 28     | XM_227484.3        | Cd5l_predicted       | 179363734        | 179425297 CD5 antigen-like (predicted)                                                                                                 |
| 29     | XM_574970.1        | LOC499650            | 179450738        | 179452834 LOC499650                                                                                                                    |
| 30     | XM_227483.3        | Spap1_predicted      | 179483570        | 179576639 SH2 domain containing phosphatase anchor protein 1 (predicted)                                                               |
| 31     | XM_574971.1        | LOC499651            | 179591714        | 179603714 similar to FLJ16478 protein                                                                                                  |
| 32     | XM_227480.3        | LOC295295            | 179625973        | 179625738 similar to phosphoglycerate mutase (EC 5.4.2.1) B chain - rat                                                                |
| 33     | NM_023982.1        | Arhgef11             | 179738870        | 179796785 Rho guanine nucleotide exchange factor (GEF) 11                                                                              |
| 34     | XM_227479.3        | RGD1309453_predicted | 179798792        | 179808808 similar to hypothetical protein FLJ32884 (predicted)                                                                         |
| 35     | XM_215648.3        | RGD1305653_predicted | 179810529        | 179834374 similar to MEGF12 (predicted)                                                                                                |
| 36     | NM_021589.1        | Ntrk1                | 179838740        | 179855545 neurotrophic tyrosine kinase, receptor, type 1                                                                               |
| 37     | XM_574972.1        | Insr                 | 179857574        | 179875876 insulin receptor-related receptor                                                                                            |
| 38     | NM_207605.3        | Sh2d2a               | 179916108        | 179924623 SH2 domain protein 2A                                                                                                        |
| 39     | XM_227476.3        | Prcc_predicted       | 179931946        | 179957221 papillary renal cell carcinoma (translocation-associated) (predicted)                                                        |
| 40     | NM_053707.2        | Hdgp                 | 179981346        | 179991892 hepatoma-derived growth factor                                                                                               |
| 41     | NM_001007637.1     | mrpl24               | 179995713        | 180001745 mitochondrial ribosomal protein L24                                                                                          |
| 42     | XM_342272.2        | RGD1311265_predicted | 180001177        | 180009023 similar to CGI-41 protein (predicted)                                                                                        |
| 43     | NM_001007741.1     | MGC94465             | 180009276        | 180018762 similar to hypothetical protein FLJ12671                                                                                     |
| 44     | NM_017244.1        | Crabp2               | 180029801        | 180034147 cellular retinoic acid binding protein 2                                                                                     |
| 45     | NM_012987.1        | Nes                  | 180051907        | 180060947 nestin                                                                                                                       |
| 46     | XM_579358.1        | LOC497759            | 180072888        | 180080749 hypothetical gene supported by NM_012916                                                                                     |
| 47     | NM_022285.1        | Hapln2               | 180104684        | 180110115 hyaluronan and proteoglycan link protein 2                                                                                   |
| 48     | XM_215614.3        | RGD1311086_predicted | 180117561        | 180131693 similar to RIKEN cDNA 2610029K21 (predicted)                                                                                 |
| 49     | XM_215635.3        | Apoa1bp_predicted    | 180132556        | 180144393 apolipoprotein A-I binding protein (predicted)                                                                               |
| 50     | XM_227396.3        | Iqgap3_predicted     | 180155674        | 180198814 IQ motif containing GTPase activating protein 3 (predicted)                                                                  |
| 51     | NM_030860.2        | Mef2d                | 180221078        | 180246917 myocyte enhancer factor 2D                                                                                                   |
| 52     | NM_183054.1        | Rhbg                 | 180320787        | 180333050 Rh type B glycoprotein                                                                                                       |
| 53     | XM_342276.2        | RGD1304953_predicted | 180371109        | 180380696 similar to SSTK-interacting protein (predicted)                                                                              |
| 54     | <b>NM_199091.1</b> | <b>Cct3</b>          | <b>180381044</b> | <b>180434156 chaperonin containing TCP1, subunit 3 (gamma)</b>                                                                         |
| 55     | NM_001004226.1     | 0610031j06rik        | 180438070        | 180441660 kidney predominant protein NCU-G1                                                                                            |
| 56     | XM_227398.3        | RGD1309886_predicted | 180442734        | 180446076 similar to RIKEN cDNA 2310042N02 (predicted)                                                                                 |
| 57     | NM_013414.1        | Bglap2               | 180482313        | 180483290 bone gamma-carboxylglutamate protein 2                                                                                       |
| 58     | XM_345231.2        | RGD1307244_predicted | 180514428        | 180526708 similar to CG5805-PA (predicted)                                                                                             |
| 59     | XM_578027.1        | LOC502539            | 180537560        | 180545828 similar to IQ motif containing GTPase activating protein 3                                                                   |
| 60     | XM_574973.1        | Sema4a_predicted     | 180552405        | 180573625 sema domain, immunoglobulin domain (Ig), transmembrane domain (TM) and short cytoplasmic domain, (semaphorin) 4A (predicted) |
| 61     | NM_001002016.1     | Lmna                 | 180595724        | 180616354 lamin A                                                                                                                      |
| 62     | XM_227403.3        | LOC310631            | 180645534        | 180653100 similar to KIAA2031 protein                                                                                                  |
| 63     | XM_227404.3        | Rab25_predicted      | 180657133        | 180662995 RAB25, member RAS oncogene family (predicted)                                                                                |
| 64     | XM_215630.3        | LOC295234            | 180665358        | 180668716 similar to late endosomal/lysosomal MP1 interacting protein                                                                  |

Area shown in yellow denotes region of overlap between the rat QTL and all human kidney disease located on human chromosome 1q21

Genes shown in bold denote that these gene were differentially expressed between the S and S.SHR(2) congenic (see supplemental Table 1)
